# Supplementary material for: Tandem catalysis with double-shelled hollow spheres
Source: Springer Nature journal article supplement (doi:10.1038/s41563-021-01183-0), 2022-01-27
Supplement: MOESM1 [file 41563_2021_1183_MOESM1_ESM.pdf]

---

**Supplementary information**

---

**Tandem catalysis with double-shelled hollow spheres**

---

In the format provided by the  
authors and unedited

## Supplementary Information for

### Tandem Catalysis with Double-Shelled Hollow Spheres

Jiadong Xiao,<sup>1,4,8</sup> Kang Cheng,<sup>2,8</sup> Xiaobin Xie,<sup>3,5</sup> Mengheng Wang,<sup>2</sup> Shiyong Xing,<sup>1</sup> Yuanshuai Liu,<sup>1,6</sup> Thomas Hartman,<sup>1</sup> Donglong Fu,<sup>1,7</sup> Koen Bossers,<sup>1</sup> Marijn A. van Huis,<sup>3</sup> Alfons van Blaaderen,<sup>3</sup> Ye Wang<sup>2,\*</sup> and Bert M. Weckhuysen<sup>1,\*</sup>

<sup>1</sup> Inorganic Chemistry and Catalysis, Debye Institute for Nanomaterials Science, Utrecht University, Universiteitsweg 99, 3584 CG Utrecht, the Netherlands

<sup>2</sup> State Key Laboratory of Physical Chemistry of Solid Surfaces, College of Chemistry and Chemical Engineering, Xiamen University, Xiamen, China

<sup>3</sup> Soft Condensed Matter, Debye Institute for Nanomaterials Science, Utrecht University, Princetonplein 5, 3584 CC Utrecht, the Netherlands

<sup>4</sup> Present address: Research Initiative for Supra-Materials, Interdisciplinary Cluster for Cutting Edge Research, Shinshu University, 4-17-1 Wakasato, Nagano-shi, Nagano 380-8553, Japan

<sup>5</sup> Present address: Electron Microscopy for Materials Science (EMAT), University of Antwerp, Groenenborgerlaan 171, B-2020 Antwerp, Belgium

<sup>6</sup> Present address: Qingdao Institute of Bioenergy and Bioprocess Technology, Chinese Academy of Sciences, Qingdao 266101, China

<sup>7</sup> Present address: Chemistry and Chemical Engineering, California Institute of Technology, Pasadena, California 91125, United States of America

<sup>8</sup> These authors contributed equally to this work

\*Email: B.M.Weckhuysen@uu.nl (B.M.W.)

wangye@xmu.edu.cn (Y.W.)

## Table of contents

|                                                                                                                                                                                                           |     |
|-----------------------------------------------------------------------------------------------------------------------------------------------------------------------------------------------------------|-----|
| Supplementary Table 1. Zeta-potentials of materials in aqueous solutions.....                                                                                                                             | S5  |
| Supplementary Fig. 1: EDS line scan of C, N and Fe elements in Fe <sup>3+</sup> -CSs. ....                                                                                                                | S6  |
| Supplementary Fig. 2: Characterization of the prepared S-1 nanocrystals. ....                                                                                                                             | S7  |
| Supplementary Fig. 3: Characterization of single-shelled hollow Fe <sub>2</sub> O <sub>3</sub> spheres.....                                                                                               | S8  |
| Supplementary Fig. 4: Size distribution and the estimated mean diameters of different materials based on their SEM images. ....                                                                           | S9  |
| Supplementary Fig. 5: STEM-HAADF image of Fe <sub>2</sub> O <sub>3</sub> @S-1 DSHSs.....                                                                                                                  | S10 |
| Supplementary Fig. 6: STEM-EDS line-scan spectra of Si, O, and Fe elements in Fe <sub>2</sub> O <sub>3</sub> @S-1 DSHSs.....                                                                              | S11 |
| Supplementary Fig. 7: Nitrogen adsorption-desorption isotherm of Fe <sub>2</sub> O <sub>3</sub> @S-1 DSHSs .....                                                                                          | S12 |
| Supplementary Fig. 8. Effect of ultrasonic and steaming treatment on the structural stability of Fe <sub>2</sub> O <sub>3</sub> @S-1 DSHSs.....                                                           | S13 |
| Supplementary Fig. 9: Synthesis of ZSM-5 using CSs and ZSM-5 (feeding Si/Al = 100) nanocrystals and following the same synthetic procedures as for Fe <sub>2</sub> O <sub>3</sub> @S-1 DSHSs .....        | S14 |
| Supplementary Fig. 10: Evidence for the hydrogen bonding between S-1 nanocrystals and Fe <sup>3+</sup> -CSs .....                                                                                         | S15 |
| Supplementary Fig. 11: In-situ XRD spectra acquired during calcination of Fe <sup>3+</sup> -CS@S-1 colloidal particles in O <sub>2</sub> /Ar (1/4, v/v) gas flow .....                                    | S16 |
| Supplementary Fig. 12: Tuning the S-1 shell thickness/volume by adjusting the quantity ratio of the S-1 nanocrystal to Fe <sup>3+</sup> -CSs .....                                                        | S17 |
| Supplementary Fig. 13: Effect of the secondary growth duration on the S-1 shell thickness .....                                                                                                           | S18 |
| Supplementary Fig. 14: Tuning the Fe <sub>2</sub> O <sub>3</sub> shell thickness by adjusting the concentration of the Fe(NO <sub>3</sub> ) <sub>3</sub> doping solution .....                            | S19 |
| Supplementary Fig. 15: Tuning the Fe <sub>2</sub> O <sub>3</sub> shell diameter by using differently sized CSs .....                                                                                      | S20 |
| Supplementary Fig. 16: Relation of the mean diameter of the hollow Fe <sub>2</sub> O <sub>3</sub> sphere in the resultant Fe <sub>2</sub> O <sub>3</sub> @S-1 DSHSs to the mean diameter of CSs used..... | S21 |
| Supplementary Fig. 17: STEM-HAADF image of Co <sub>3</sub> O <sub>4</sub> @S-1 DSHSs .....                                                                                                                | S22 |
| Supplementary Fig. 18: STEM-HAADF image of CuO@S-1 DSHSs .....                                                                                                                                            | S23 |
| Supplementary Fig. 19: STEM-HAADF image of Mn <sub>2</sub> O <sub>3</sub> @S-1 MSHSs.....                                                                                                                 | S24 |
| Supplementary Fig. 20: STEM-HAADF image of NiO@S-1 DSHSs .....                                                                                                                                            | S25 |

|                                                                                                                                                                                                                                                            |     |
|------------------------------------------------------------------------------------------------------------------------------------------------------------------------------------------------------------------------------------------------------------|-----|
| Supplementary Fig. 21: STEM-HAADF image of Co-Fe <sub>2</sub> O <sub>3</sub> @S-1 DSHSs .....                                                                                                                                                              | S26 |
| Supplementary Fig. 22: Characterization of NiCo <sub>2</sub> O <sub>4</sub> @S-1 DSHSs .....                                                                                                                                                               | S27 |
| Supplementary Fig. 23: Characterization of Fe <sub>2</sub> O <sub>3</sub> @ZSM-5 (feeding Si/Al = 100) DSHSs .....                                                                                                                                         | S28 |
| Supplementary Fig. 24: Characterization of ZSM-5 (feeding Si/Al = 100) nanocrystals .....                                                                                                                                                                  | S29 |
| Supplementary Fig. 25. Synthesis of Fe <sub>2</sub> O <sub>3</sub> @ZSM-5 (Si/Al = ca. 50) DSHSs.....                                                                                                                                                      | S30 |
| Supplementary Fig. 26: Characterization of Si-Beta zeolite nanocrystals and CuO@Beta DSHSs. ....                                                                                                                                                           | S31 |
| Supplementary Fig. 27: Characterization of bulk Fe <sub>2</sub> O <sub>3</sub> .....                                                                                                                                                                       | S32 |
| Supplementary Fig. 28: Characterization of Fe <sub>2</sub> O <sub>3</sub> /ZSM-5 prepared by a typical impregnation method.....                                                                                                                            | S33 |
| Supplementary Table 2. Catalytic performances of iron catalysts and bifunctional catalysts in syngas conversion.....                                                                                                                                       | S34 |
| Supplementary Table 3. S <sub>BET</sub> values of the catalysts. ....                                                                                                                                                                                      | S35 |
| Supplementary Fig. 29: Comparison of the acid properties between Fe <sub>2</sub> O <sub>3</sub> @H-ZSM-5 DSHSs and Fe <sub>2</sub> O <sub>3</sub> /H-ZSM-5 .....                                                                                           | S36 |
| Supplementary Fig. 30: NH <sub>3</sub> -TPD profiles of Fe <sub>2</sub> O <sub>3</sub> @H-ZSM-5 DSHSs and Fe <sub>2</sub> O <sub>3</sub> /H-ZSM-5 .....                                                                                                    | S37 |
| Supplementary Table 4. Effect of the H-ZSM-5 shell thickness on the catalytic performance of Fe <sub>2</sub> O <sub>3</sub> @H-ZSM-5 DSHSs in syngas conversion .....                                                                                      | S38 |
| Supplementary Fig. 31. Control of the Fe <sub>2</sub> O <sub>3</sub> /H-ZSM-5 proportion in Fe <sub>2</sub> O <sub>3</sub> @H-ZSM-5 DSHSs by tuning the HZSM-5 shell thickness while fixing the thickness of the Fe <sub>2</sub> O <sub>3</sub> layer..... | S39 |
| Supplementary Fig. 32. Distribution of the hydrocarbon products over Fe <sub>2</sub> O <sub>3</sub> @H-ZSM-5 DSHSs with different H-ZSM-5 shell thicknesses.....                                                                                           | S40 |
| Supplementary Table 5. Comparison between the performances of the state-of-the-art Fe-zeolite-based bifunctional catalysts in gasoline production via FTS .....                                                                                            | S41 |
| Supplementary Fig. 33. Detection of the formed iron carbides (FeC <sub>x</sub> ) in the bifunctional catalysts .....                                                                                                                                       | S42 |
| Supplementary Table 6. Phase quantification of iron species in reacted Fe <sub>2</sub> O <sub>3</sub> @H-ZSM-5 DSHSs, Fe <sub>2</sub> O <sub>3</sub> /H-ZSM-5 and hs-Fe <sub>2</sub> O <sub>3</sub> +H-ZSM-5 for 45 h on stream.....                       | S43 |
| Supplementary Fig. 34. H <sub>2</sub> temperature-programmed reduction (H <sub>2</sub> -TPR) profiles of the prepared bifunctional catalysts .....                                                                                                         | S44 |
| Supplementary Fig. 35. H <sub>2</sub> adsorption isotherm of Fe <sub>2</sub> O <sub>3</sub> @H-ZSM-5 DSHSs and hs-Fe <sub>2</sub> O <sub>3</sub> +H-ZSM-5 .....                                                                                            | S45 |

|                                                                                                                                                                                                         |     |
|---------------------------------------------------------------------------------------------------------------------------------------------------------------------------------------------------------|-----|
| Supplementary Fig. 36. C <sub>3</sub> H <sub>6</sub> -TPD profiles of Fe <sub>2</sub> O <sub>3</sub> @H-ZSM-5 DSHSs and hs-Fe <sub>2</sub> O <sub>3</sub> +H-ZSM-5 .....                                | S46 |
| Supplementary Fig. 37. Catalytic stabilities of (a) Fe <sub>2</sub> O <sub>3</sub> @H-ZSM-5 DSHSs, (b) Fe <sub>2</sub> O <sub>3</sub> /H-ZSM-5 and (c) hs-Fe <sub>2</sub> O <sub>3</sub> +H-ZSM-5 ..... | S47 |
| Supplementary Table 7. Catalytic performance over the bifunctional catalysts of different times on stream .....                                                                                         | S48 |
| Supplementary Fig. 38. Structural stability of Fe <sub>2</sub> O <sub>3</sub> @H-ZSM-5 DSHSs after FTS reaction and regeneration .....                                                                  | S49 |
| Supplementary Fig. 39. Schematic representation of different configurations that FTS phases and the zeolite may have with respect to on another in bifunctional systems. ....                           | S50 |
| Supplementary references .....                                                                                                                                                                          | S51 |

**Supplementary Table 1. Zeta-potentials of materials in aqueous solutions.**

| Material                           | $\zeta$ -Potential/mV |
|------------------------------------|-----------------------|
| CSs <sup>a</sup>                   | $-18.9 \pm 0.3$       |
| Fe <sup>3+</sup> -CSs <sup>a</sup> | $-13.5 \pm 1.1$       |
| S-1 nanocrystal <sup>b</sup>       | $-14.4 \pm 1.1$       |

[a] 1 g L<sup>-1</sup> in distilled water; [b] 1 wt% of sample was dispersed in distilled water.

**Note:** Although the Fe<sup>3+</sup> doping treatment of CSs ( $\zeta$ -potential =  $-18.9$  mV) neutralized to some degree the negative surface charge of CSs, the resultant Fe<sup>3+</sup>-CSs ( $\zeta$ -potential =  $-13.5$  mV) still exhibited negatively charged surfaces. The change in surface charge was minor, possibly because CSs adsorbed also a similar number of nitrate anions, as we also detected N species within Fe<sup>3+</sup>-CSs by the STEM-EDS analysis (Supplementary Fig. 1). Negatively charged CSs with abundant  $-\text{OH}$  and  $-\text{C}=\text{O}$  groups on surface (Supplementary Fig. 10) tend to adsorb oxygen-containing anions (e.g.,  $\text{NO}_3^-$ ) because of the similar elemental composition<sup>1</sup>, which promotes further the adsorption of Fe<sup>3+</sup> cations through electrostatic attractions.

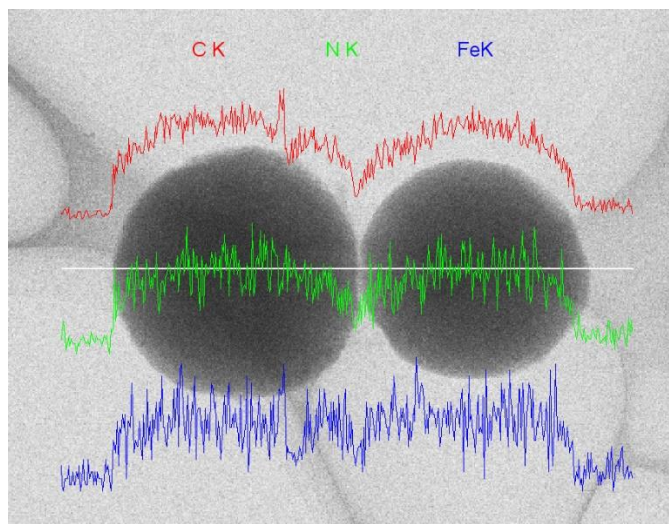

**Supplementary Fig. 1: EDS line scan of C, N and Fe elements in Fe<sup>3+</sup>-CSs.**

**Note:** Owing to the electrostatic attraction between the positively charged Fe<sup>3+</sup> cations and negatively charged CSs ( $\zeta$ -potential =  $-18.9$  mV, Supplementary Table 1) and the existing nanopores of CSs,<sup>2</sup> Fe<sup>3+</sup> cations traveled into and resided throughout the CSs interior. The EDS curves of N and Fe elements exhibited the same spherical shape as that of C element, indicating that the adsorbed nitrates and Fe<sup>3+</sup> species inside Fe<sup>3+</sup>-CSs are almost evenly distributed. Note that this EDS measurement was specially performed on a Hitachi HD-2300A STEM.

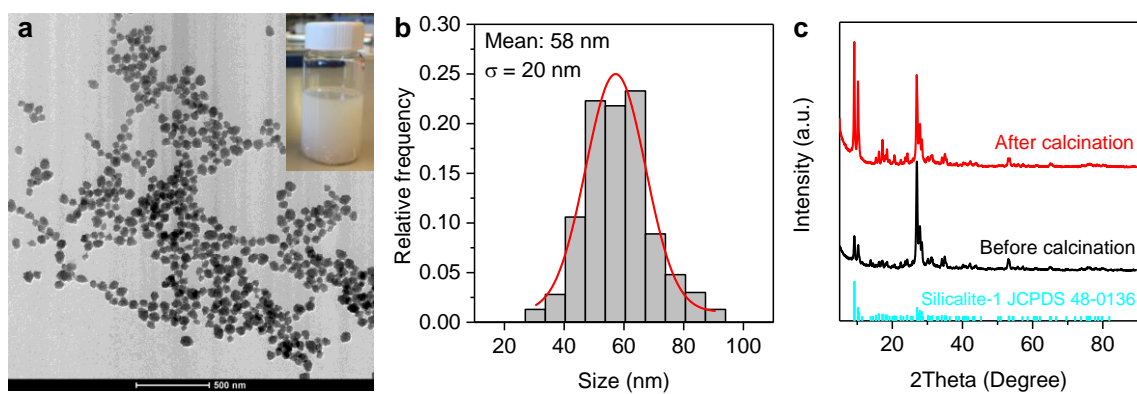

**Supplementary Fig. 2: Characterization of the prepared S-1 nanocrystals.** (a) TEM image, (b) size distribution with the estimated mean size, and (c) XRD patterns of S-1 nanocrystals before and after calcination in air. The inlet in panel **a** shows the photograph of 1 wt% S-1 nanocrystal suspension in distilled water.



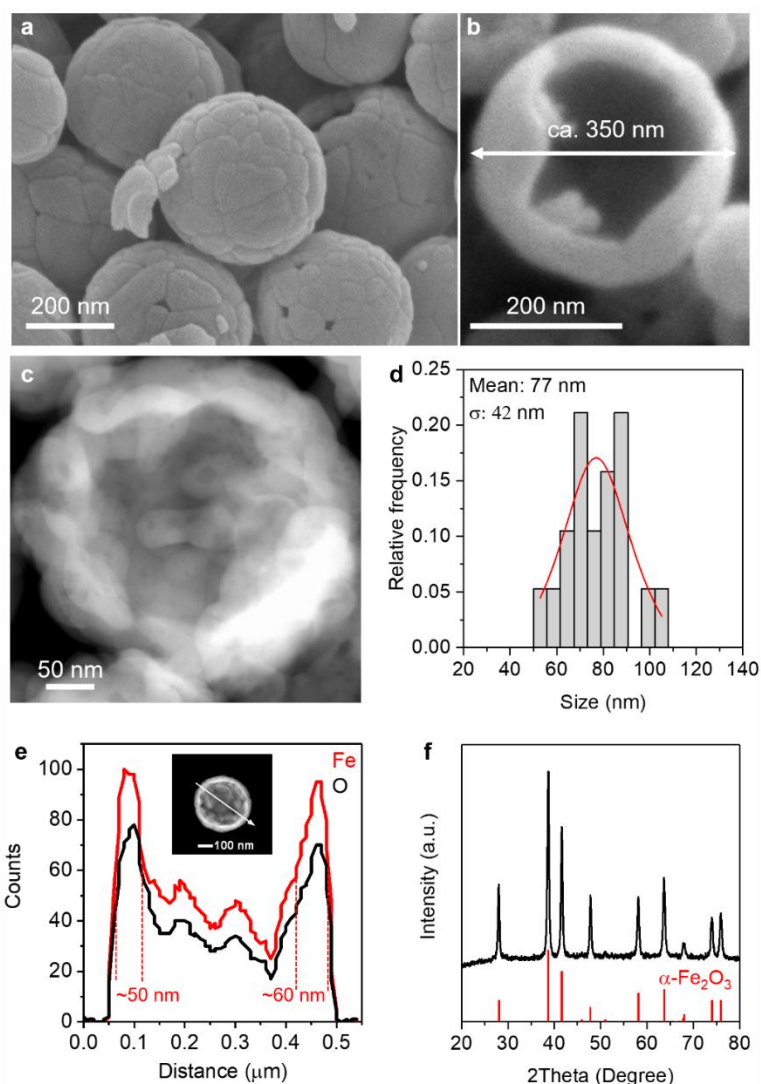

**Supplementary Fig. 3: Characterization of single-shelled hollow  $\text{Fe}_2\text{O}_3$  spheres (hs- $\text{Fe}_2\text{O}_3$ ) prepared by direction calcination of  $\text{Fe}^{3+}$ -CSs in air.** (a and b) SEM and (c) STEM-HAADF images of hs- $\text{Fe}_2\text{O}_3$ . (d) estimation of the average  $\text{Fe}_2\text{O}_3$  crystal size of the longest dimension in hs- $\text{Fe}_2\text{O}_3$ . (e) Fe and O EDS line-scan spectra, and (f) XRD patterns of hs- $\text{Fe}_2\text{O}_3$ .

**Note:** Calcining  $\text{Fe}^{3+}$ -CSs in air directly generated single-shelled hollow  $\alpha\text{-Fe}_2\text{O}_3$  spheres with diameters of ca. 350 nm and thicknesses of 50–60 nm. Although the average  $\alpha\text{-Fe}_2\text{O}_3$  crystal size of the longest dimension was 77 nm, the  $S_{\text{BET}}$  of hs- $\text{Fe}_2\text{O}_3$  reached as high as 61.2  $\text{m}^2/\text{g}$  (Supplementary Table 3) due to the unique hollow-sphere structure composed of cambered-tile-like  $\alpha\text{-Fe}_2\text{O}_3$  crystals. Note that the  $\text{Fe}_2\text{O}_3$  component in the hollow  $\text{Fe}_2\text{O}_3$  sphere@S-1 colloidal particles and  $\text{Fe}_2\text{O}_3$ @S-1(ZSM-5) DSHSs was the same as the hs- $\text{Fe}_2\text{O}_3$  here.

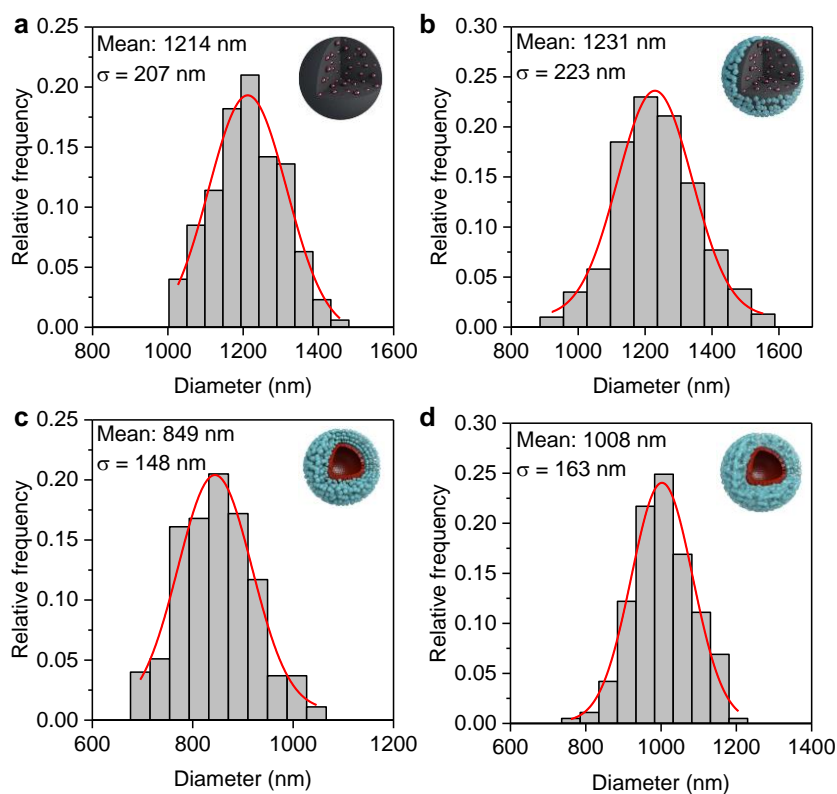

**Supplementary Fig. 4: Size distribution and the estimated mean diameters of different materials based on their SEM images.** (a)  $\text{Fe}^{3+}$ -CSSs, (b)  $\text{Fe}^{3+}$ -CS@S-1 colloids, (c) hollow  $\text{Fe}_2\text{O}_3$  sphere@S-1 colloids, and (d)  $\text{Fe}_2\text{O}_3$ @S-1 DSHSs. Gaussian distribution was used for the estimation of the mean size.

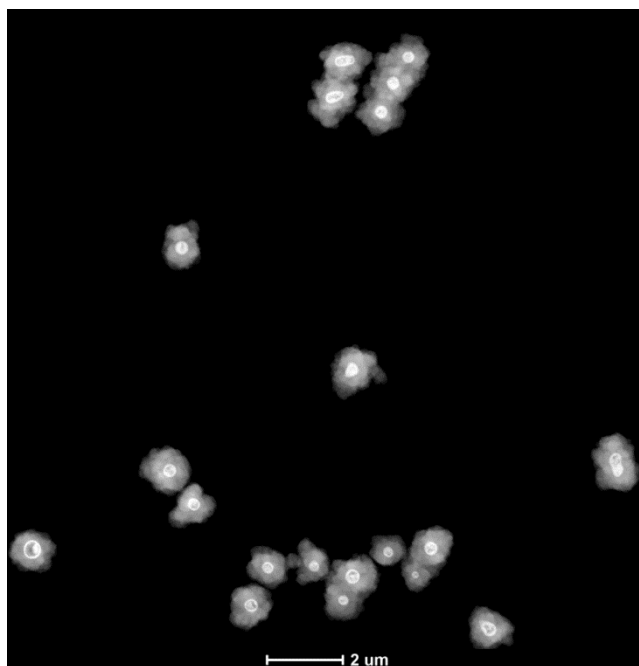

**Supplementary Fig. 5: STEM-HAADF image of Fe<sub>2</sub>O<sub>3</sub>@S-1 DSHSs.**

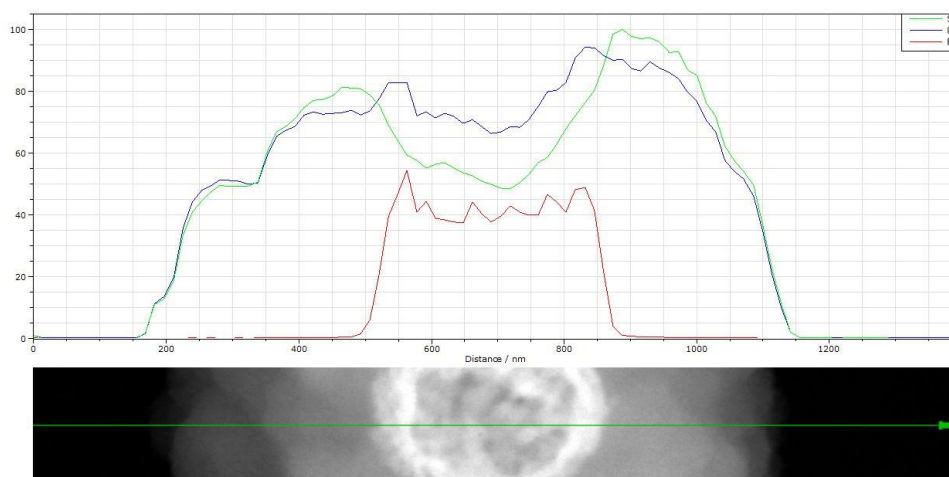

**Supplementary Fig. 6: STEM-EDS line-scan spectra of Si, O, and Fe elements in  $\text{Fe}_2\text{O}_3@\text{S-1}$  DSHSs.** This clearly indicates that the a  $\text{Fe}_2\text{O}_3@\text{S-1}$  DSHS particle comprises a hollow  $\text{Fe}_2\text{O}_3$  sphere as the inner shell and a hollow S-1 sphere as the outer shell.

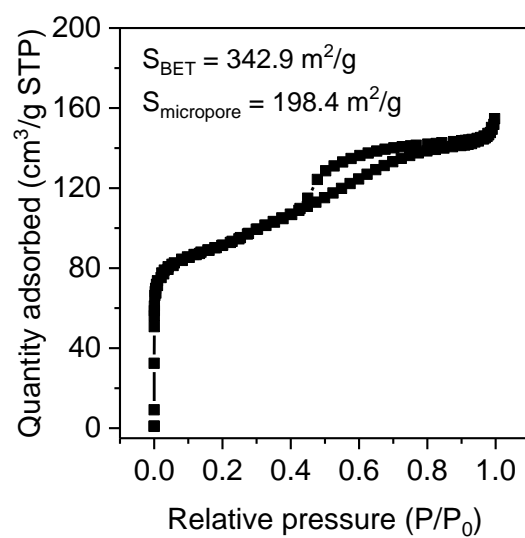

**Supplementary Fig. 7: Nitrogen adsorption-desorption isotherm of Fe<sub>2</sub>O<sub>3</sub>@S-1 DSHSs.** The micropore area was determined by the t-plot method.

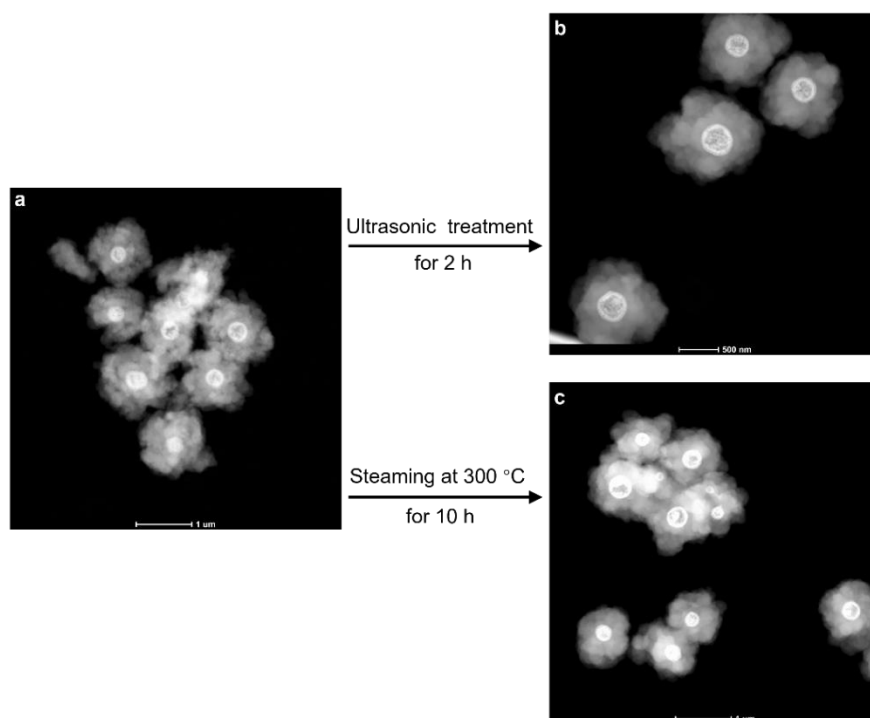

**Supplementary Fig. 8. Effect of ultrasonic and steaming treatment on the structural stability of Fe<sub>2</sub>O<sub>3</sub>@S-1 DSHSs.** STEM-HAADF images of Fe<sub>2</sub>O<sub>3</sub>@S-1 DSHSs (the material in Supplementary Fig. 12c) (a) without any treatment, and with (b) ultrasonic treatment (300 W, 28 kHz) for 2 h or (c) steaming treatment (H<sub>2</sub>O-containing N<sub>2</sub> flow: 40 mL min<sup>-1</sup>) at 300 °C for 10 h.

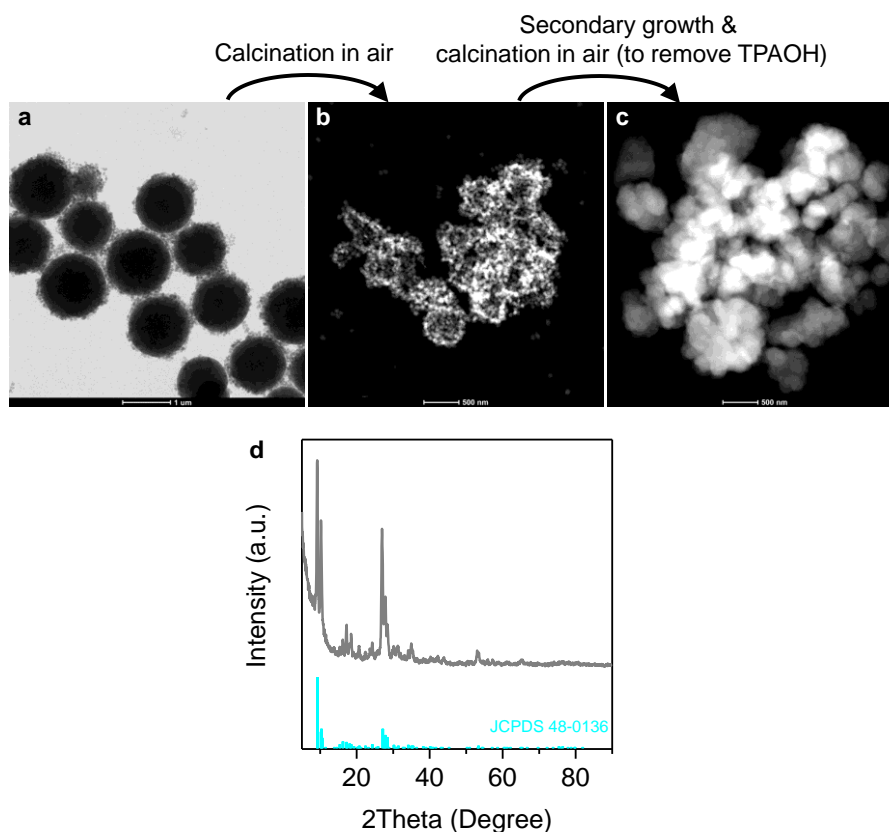

**Supplementary Fig. 9: Synthesis of ZSM-5 using CSs and ZSM-5 (feeding Si/Al = 100) nanocrystals and following the same synthetic procedures as for  $\text{Fe}_2\text{O}_3\text{@S-1 DSHSs}$ .** (a) TEM image of CS@ZSM-5 colloids, (b) STEM-HAADF image of ZSM-5 nanocrystal stacked sphere (obtained by calcination of CS@ZSM-5 colloids in air), (c) STEM-HAADF image and (d) XRD patterns of ZSM-5 (obtained by secondary growth of the ZSM-5 nanocrystal stacked sphere, followed by calcination in air).

**Note:** This is a control experiment, demonstrating that the transformation from  $\text{M}^{n+}$ -CSs to hollow MO spheres is vital for forming the final MO@ZEO DSHSs structure. If CSs were used instead of  $\text{Fe}^{3+}$ -CSs, no hollow  $\text{Fe}_2\text{O}_3$  spheres were formed to prop up the attached zeolite nanocrystals (plot b). Finally, only solid sphere-like zeolite formed (plot c). The solid sphere-like ZSM-5 (plot c and d) was further used to synthesize  $\text{hs-Fe}_2\text{O}_3\text{+H-ZSM-5}$  and  $\text{Fe}_2\text{O}_3\text{/H-ZSM-5}$  for catalytic syngas conversion.

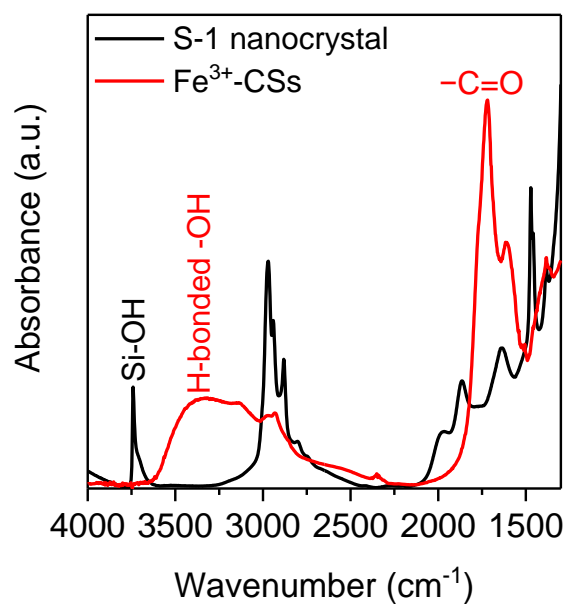

**Supplementary Fig. 10: Evidence for the hydrogen bonding between S-1 nanocrystals and Fe<sup>3+</sup>-CSs.** FT-IR spectra of S-1 nanocrystals (with TPAOH) and Fe<sup>3+</sup>-CSs acquired at 150 °C under vacuum conditions.

**Note:** The intense and sharp IR band at  $\sim 3740\text{ cm}^{-1}$ , observed in S-1 nanocrystals, is attributed to free terminal Si–OH groups<sup>3</sup>. As CSs were synthesized by hydrothermal polymerization of sucrose, Fe<sup>3+</sup>-CSs exhibited a typical hydrogen-bonded O–H stretching mode, characterized by an intense and broad IR band at  $\sim 3350\text{ cm}^{-1}$ .<sup>4</sup>



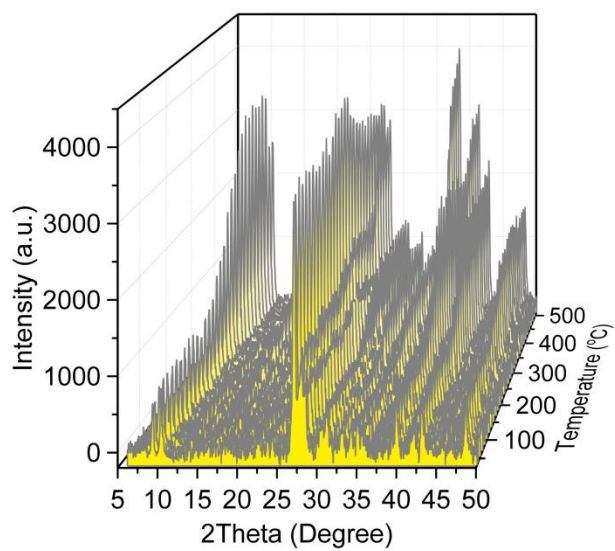

**Supplementary Fig. 11: In-situ XRD spectra acquired during calcination of Fe<sup>3+</sup>-CS@S-1 colloidal particles in O<sub>2</sub>/Ar (1/4, v/v) gas flow.**

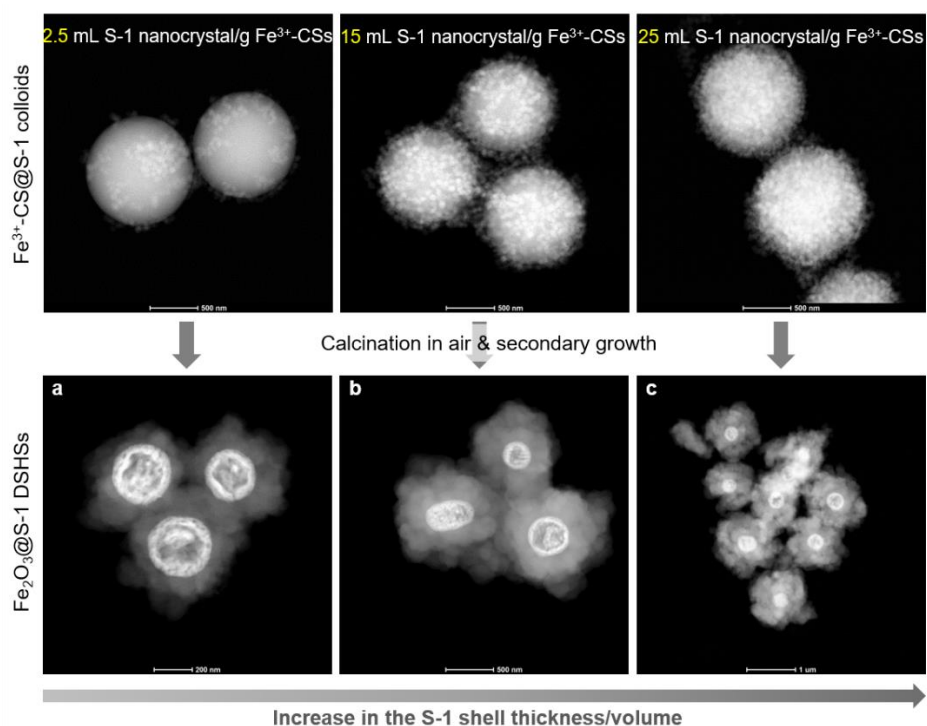

**Supplementary Fig. 12: Tuning the S-1 shell thickness/volume by adjusting the quantity ratio of the S-1 nanocrystal to  $\text{Fe}^{3+}\text{-CSs}$ .** STEM-HAADF image of the synthesized  $\text{Fe}^{3+}\text{-CS@S-1}$  colloids and  $\text{Fe}_2\text{O}_3\text{@S-1}$  DSHSs, using (a) 2.5, (b) 15, and (c) 25 mL S-1 nanocrystal suspension (1 wt% in distilled water) for each gram of  $\text{Fe}^{3+}\text{-CSs}$ . Other synthetic conditions: 1.5 M  $\text{Fe}(\text{NO}_3)_3$  for doping 1.2  $\mu\text{m}$  CSs at room temperature; secondary growth of the S-1 shell at 95  $^\circ\text{C}$  for 1 day.

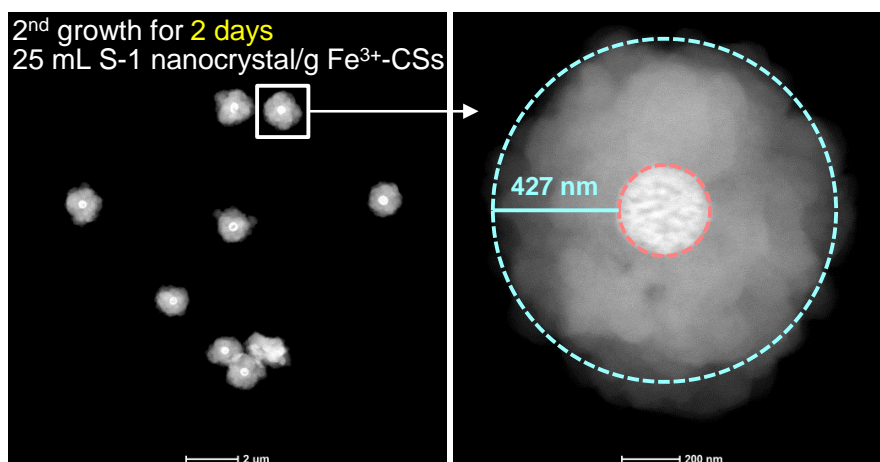

**Supplementary Fig. 13: Effect of the secondary growth duration on the S-1 shell thickness.** STEM-HAADF image of Fe<sub>2</sub>O<sub>3</sub>@S-1 DSHSs prepared with two days' secondary growth of the S-1 shell.

**Note:** The only difference between this sample (2 days' secondary growth of S-1 shell) and the sample (1 day) in Fig. 4a3 lies in the secondary growth duration. Extending the secondary growth time from 1 day to 2 days leads to only a slight increase in the S-1 shell thickness from ca. 400 nm (Fig. 4a3) to ca. 427 nm (Supplementary Fig. 13).

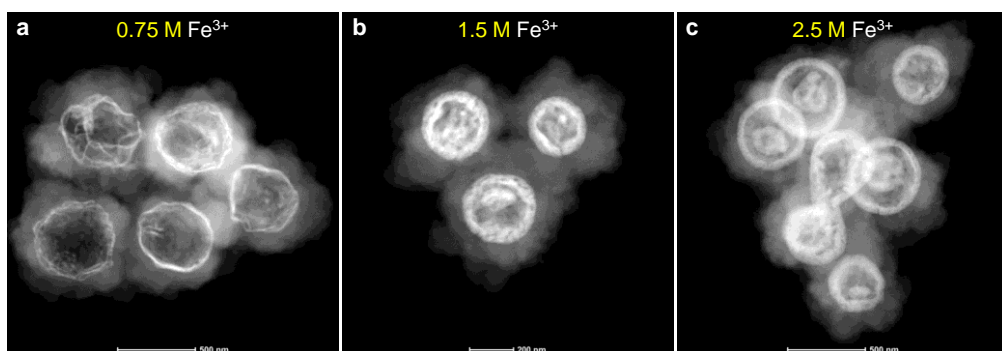

**Supplementary Fig. 14: Tuning the  $\text{Fe}_2\text{O}_3$  shell thickness by adjusting the concentration of the  $\text{Fe}(\text{NO}_3)_3$  doping solution.** STEM-HAADF image of  $\text{Fe}_2\text{O}_3$ @S-1 DSHSs synthesized using (a) 0.75, (b) 1.5 and (c) 2.5 M  $\text{Fe}(\text{NO}_3)_3$  as the doping solution. Other synthetic conditions: doping 1.2  $\mu\text{m}$  CSs at room temperature; 2.5 mL S-1 nanocrystal suspension (1 wt% in distilled water) for each gram of  $\text{Fe}^{3+}$ -CSs; secondary growth of the S-1 shell at 95  $^\circ\text{C}$  for 1 day.

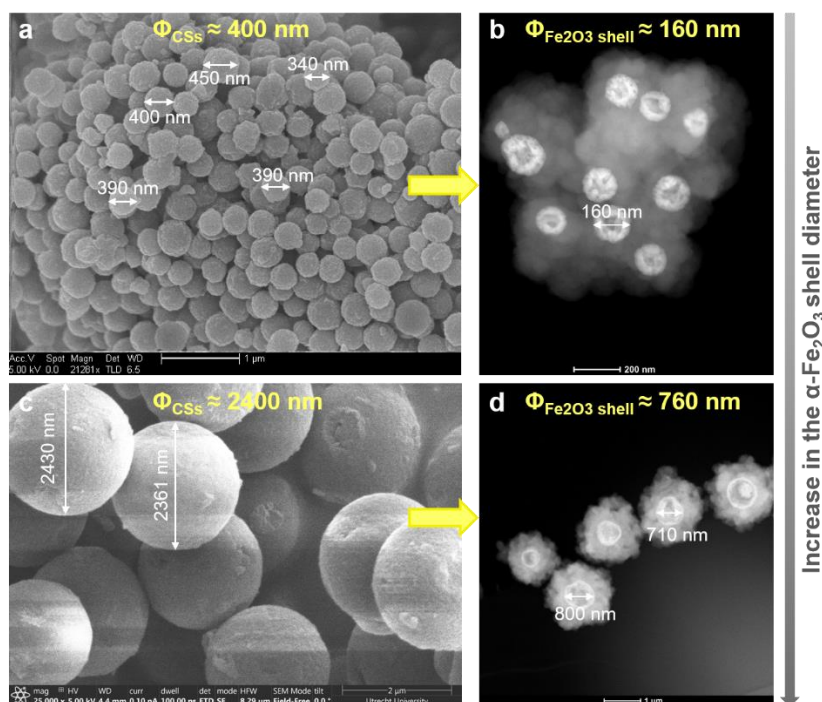

**Supplementary Fig. 15: Tuning the Fe<sub>2</sub>O<sub>3</sub> shell diameter by using differently sized CSs.** SEM images of CSs with diameters of ca. (a) 0.4 μm and (c) 2.4 μm. They were synthesized by hydrothermal polymerization of 60 mL 1.5 M sucrose (aq.) at 190 °C for 90 and 135 min, respectively. (b and d) STEM-HAADF image of Fe<sub>2</sub>O<sub>3</sub>@S-1 DSHSs synthesized with these two differently sized CSs as the precursor. Other synthetic conditions: 1.5 M Fe(NO<sub>3</sub>)<sub>3</sub> for doping CSs at room temperature; 15 mL S-1 nanocrystal suspension (1 wt% in distilled water) for each gram of Fe<sup>3+</sup>-CSs; secondary growth of the S-1 shell at 95 °C for 1 day.

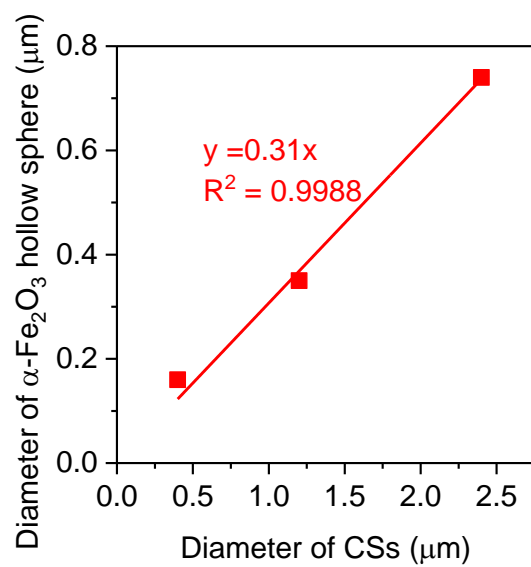

**Supplementary Fig. 16: Relation of the mean diameter of the hollow Fe<sub>2</sub>O<sub>3</sub> sphere in the resultant Fe<sub>2</sub>O<sub>3</sub>@S-1 DSHSs to the mean diameter of CSs used.**

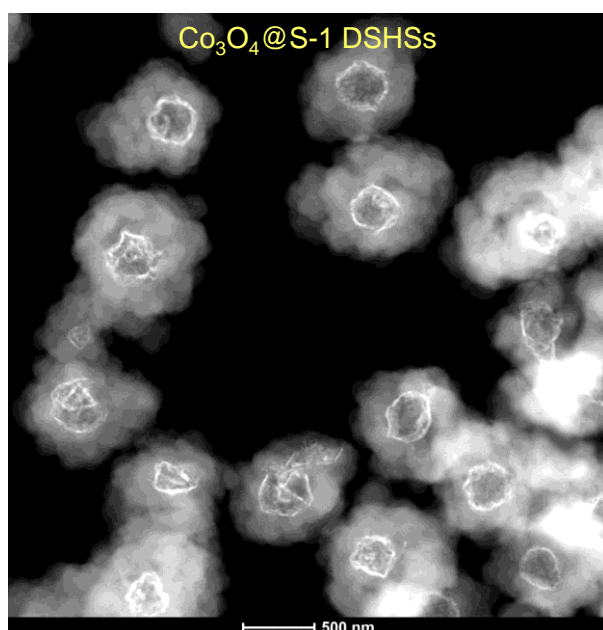

**Supplementary Fig. 17: STEM-HAADF image of the synthesized Co<sub>3</sub>O<sub>4</sub>@S-1 DSHSs.** Synthetic conditions: 1.0 M Co(NO<sub>3</sub>)<sub>2</sub> for doping 1.2  $\mu$ m CSs at room temperature; 15 mL S-1 nanocrystal suspension (1 wt% in distilled water) for each gram of Co<sup>2+</sup>-CSs; secondary growth of the S-1 shell at 95 °C for 1 day.

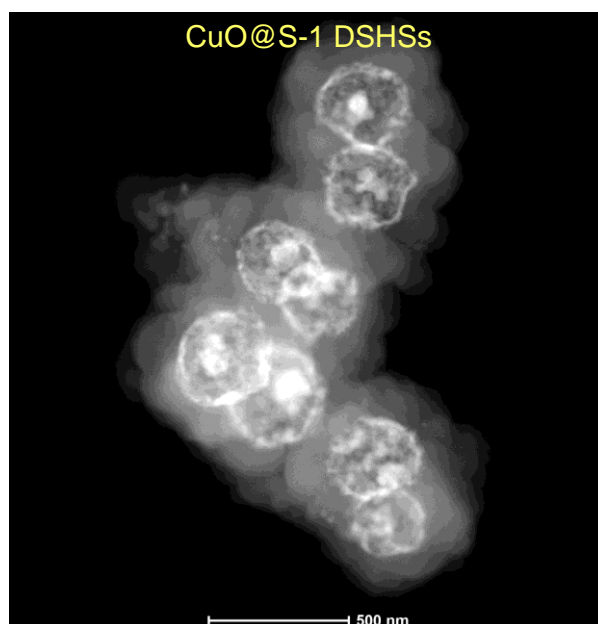

**Supplementary Fig. 18: STEM-HAADF image of the synthesized CuO@S-1 DSHSs.** Synthetic conditions: 1.5 M  $\text{Cu}(\text{NO}_3)_2$  for doping 1.2  $\mu\text{m}$  CSs at room temperature; 2.5 mL S-1 nanocrystal suspension (1 wt% in distilled water) for each gram of  $\text{Cu}^{2+}$ -CSs; secondary growth of the S-1 shell at 95 °C for 1 day.



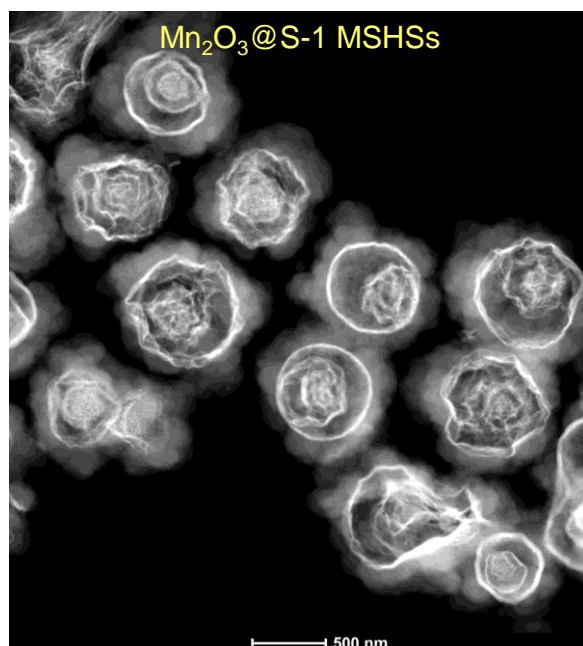

**Supplementary Fig. 19: STEM-HAADF image of the synthesized  $\text{Mn}_2\text{O}_3@\text{S-1}$  MSHSs.** Synthetic conditions: 0.5 M  $\text{Mn}(\text{NO}_3)_2$  for doping 1.2  $\mu\text{m}$  CSs at 35  $^\circ\text{C}$ ; 2.5 mL S-1 nanocrystal suspension (1 wt% in distilled water) for each gram of  $\text{Mn}^{2+}$ -CSs; secondary growth of the S-1 shell at 95  $^\circ\text{C}$  for 1 day.

**Note:** It should be noted that the particular formation of triple-shelled and quadruple-shelled  $\text{Mn}_2\text{O}_3$  hollow spheres (Fig. 4d3 and Supplementary Fig. 19) is due to the enrichment of Mn species inside  $\text{Mn}^{2+}$ -CSs, caused by performing the doping process at a higher temperature (35  $^\circ\text{C}$ ). According to the Arrhenius equation<sup>5</sup>, a higher temperature value results in a higher diffusion rate coefficient and, hence, more  $\text{Mn}^{2+}$  ions can be adsorbed by CSs. This indicates that the number of concentric hollow MO spheres is likely controllable by governing various factors (e.g., metal precursor concentration, doping temperature, doping duration, and solvent property) impacting the adsorption efficiency of metal cations by CSs.

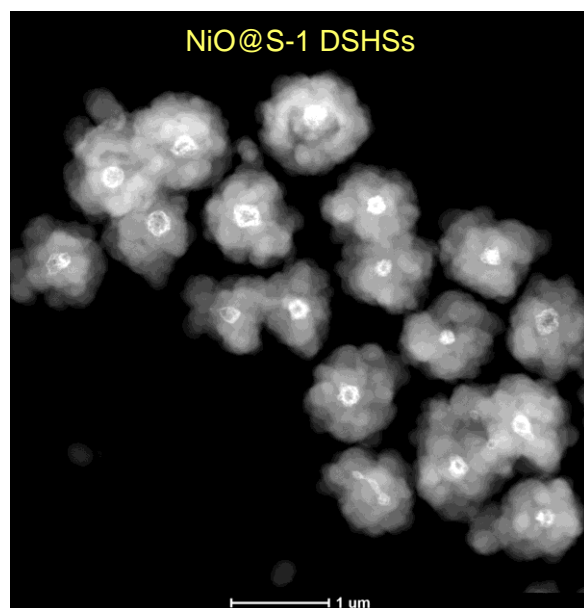

**Supplementary Fig. 20: STEM-HAADF image of the synthesized NiO@S-1 DSHSs.** Synthetic conditions: 1.0 M  $\text{Ni}(\text{NO}_3)_2$  doping 0.4  $\mu\text{m}$  CSs at room temperature; 25 mL S-1 nanocrystal suspension (1 wt% in distilled water) for each gram of  $\text{Ni}^{2+}$ -CSs; secondary growth of the S-1 shell at 95 °C for 1 day.

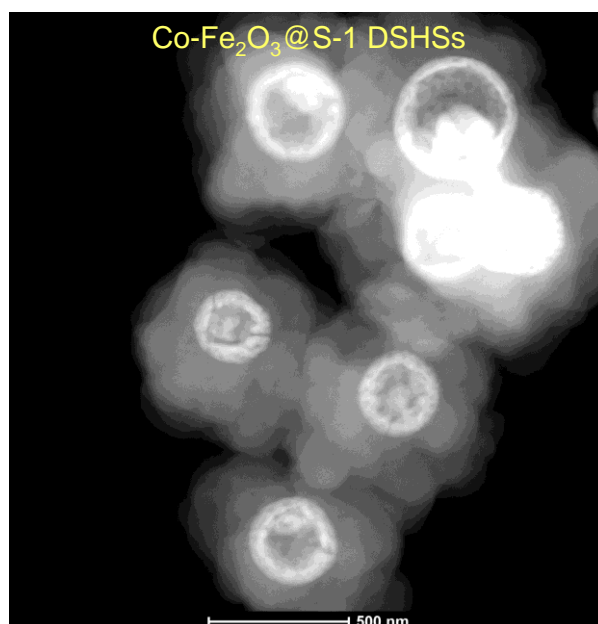

**Supplementary Fig. 21: STEM-HAADF image of the synthesized Co-Fe<sub>2</sub>O<sub>3</sub>@S-1 DSHSs.** Synthetic conditions: 1.5 M Fe(NO<sub>3</sub>)<sub>3</sub> and 1.0 M Co(NO<sub>3</sub>)<sub>2</sub> for doping 1.2  $\mu$ m CSs at room temperature; 15 mL S-1 nanocrystal suspension (1 wt% in distilled water) for each gram of Fe<sup>3+</sup>/Co<sup>2+</sup>-CSs; secondary growth of the S-1 shell at 95 °C for 1 day.

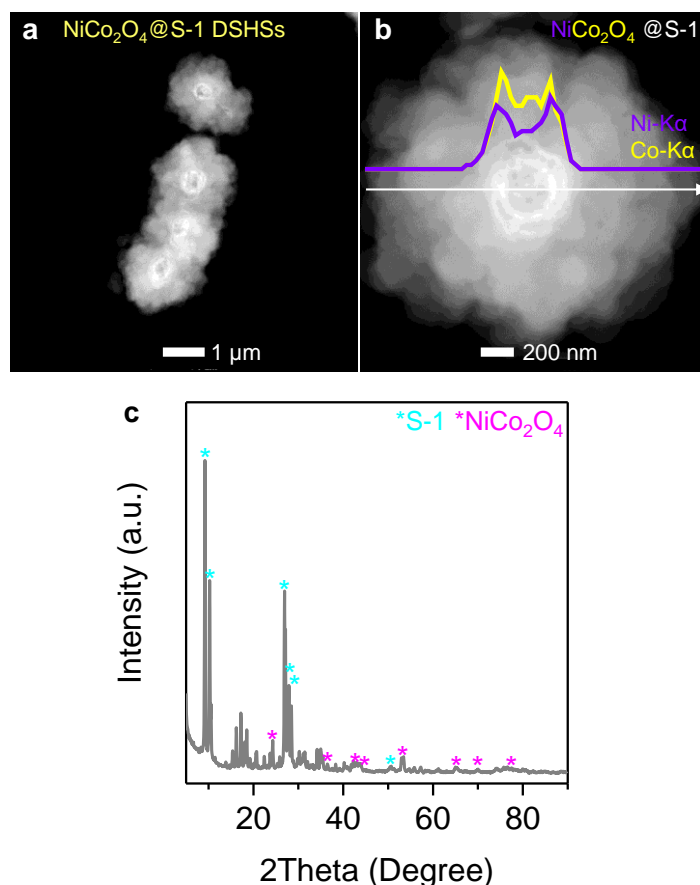

**Supplementary Fig. 22: Characterization of the synthesized  $\text{NiCo}_2\text{O}_4@\text{S-1}$  DSHSs.** (a and b) STEM-HAADF images with EDS line-scan spectra and (c) XRD patterns of the synthesized  $\text{NiCo}_2\text{O}_4@\text{S-1}$  DSHSs. Synthetic conditions: 1.0 M  $\text{Ni}(\text{NO}_3)_2$  and 2.0 M  $\text{Co}(\text{NO}_3)_2$  for doping 2.4  $\mu\text{m}$  CSs at room temperature; 25 mL S-1 nanocrystal suspension (1 wt% in distilled water) for each gram of  $\text{Ni}^{2+}/\text{Co}^{2+}$ -CSs; secondary growth of the S-1 shell at 95  $^\circ\text{C}$  for 1 day.

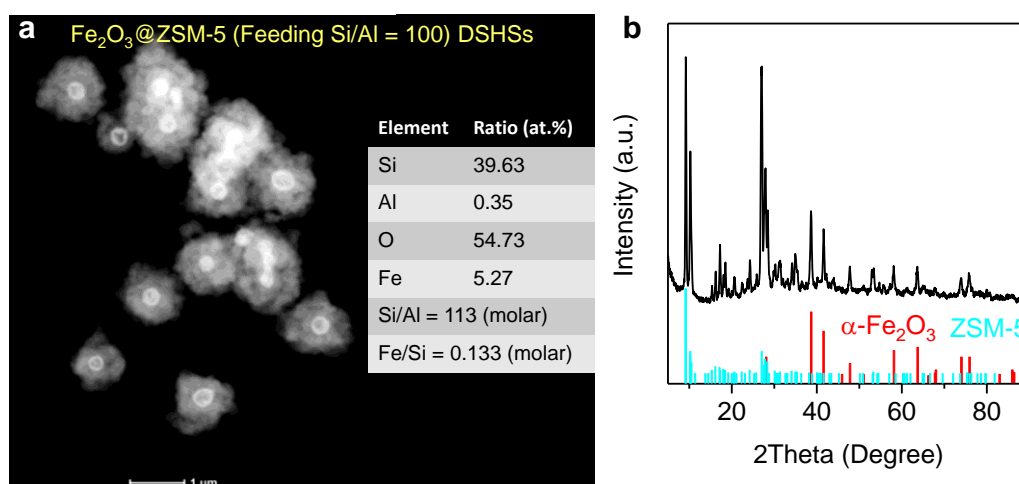

**Supplementary Fig. 23: Characterization of the synthesized  $\text{Fe}_2\text{O}_3@\text{ZSM-5}$  (feeding Si/Al = 100) DSHSs.** (a) STEM-HAADF image and EDS quantification results; (b) XRD patterns. Synthetic conditions: 1.5 M  $\text{Fe}(\text{NO}_3)_3$  solution for doping 1.2  $\mu\text{m}$  CSs at room temperature; 15 mL ZSM-5 (feeding Si/Al = 100, Supplementary Fig. 24) nanocrystal suspension (1 wt% in distilled water) for each gram of  $\text{Fe}^{3+}$ -CSs; secondary growth of the ZSM-5 shell at 95  $^\circ\text{C}$  for 1 day (the Si/Al ratio of the nutrient sol is 100).

**Note:** The mass fraction of  $\text{Fe}_2\text{O}_3$  to ZSM-5 in this material was determined to be 1:9 by the X-ray fluorescence analysis.

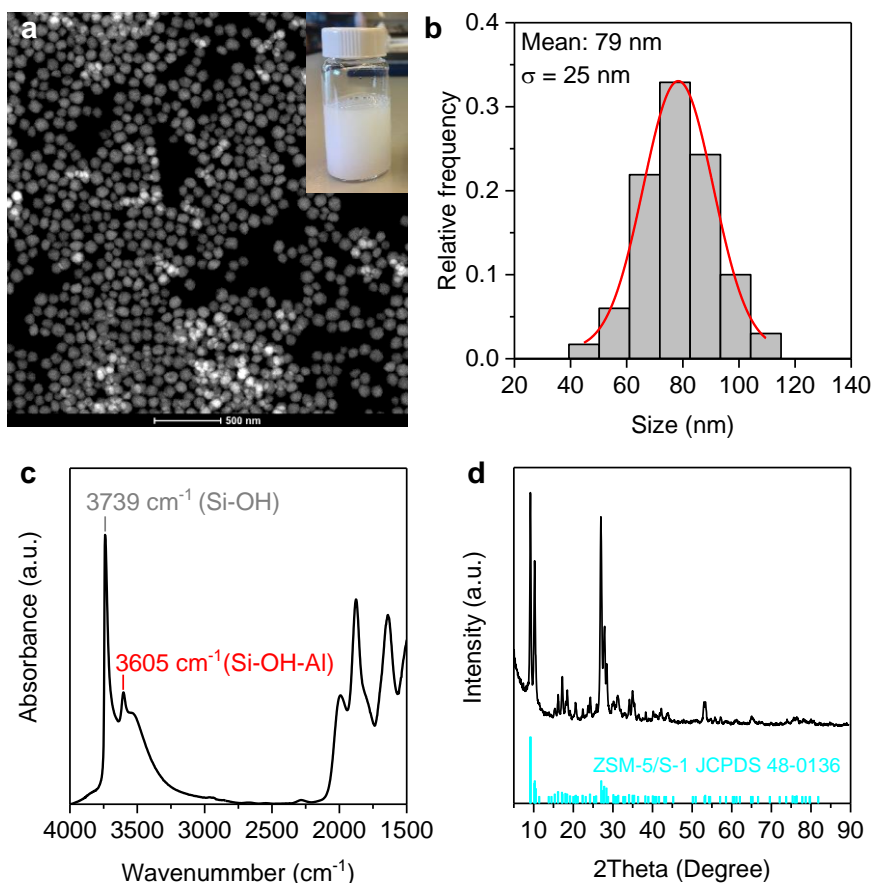

**Supplementary Fig. 24: Characterization of ZSM-5 (feeding Si/Al = 100) nanocrystals.** (a) STEM-HAADF image and (b) size distribution of the ZSM-5 (feeding Si/Al = 100) nanocrystals. (c) IR spectra (acquired at 150 °C under vacuum conditions) and XRD patterns of the H-ZSM-5 nanocrystals (after removing TPAOH by calcination and conversion into the H-form). The inset in panel a shows the photograph of 1 wt% ZSM-5 nanocrystal suspension in distilled water.

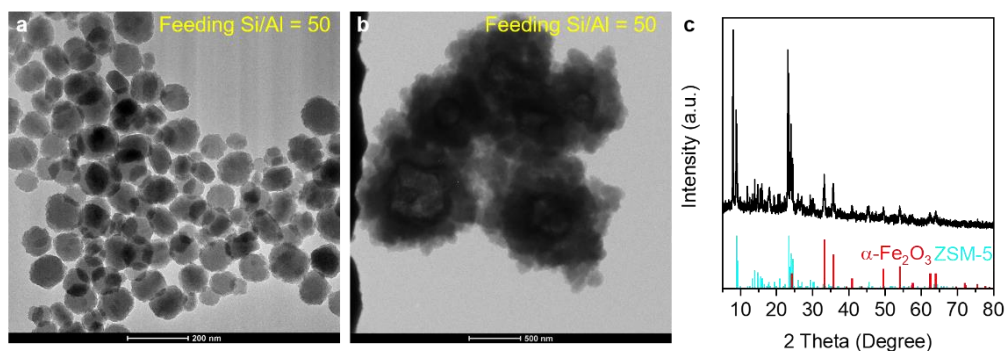

**Supplementary Fig. 25. Synthesis of  $\text{Fe}_2\text{O}_3@\text{ZSM-5}$  (Si/Al = ca. 50) DSHSs.** TEM images of (a) the prepared ZSM-5 (feeding Si/Al = 50) nanocrystals and (b)  $\text{Fe}_2\text{O}_3@\text{ZSM-5}$  DSHSs (feeding Si/Al = 50). (c) XRD pattern of the latter material. Synthetic conditions: 1.5 M  $\text{Fe}(\text{NO}_3)_3$  solution for doping 1.2  $\mu\text{m}$  CSs at room temperature; 15 mL 1 wt% ZSM-5 (feeding Si/Al = 50) nanocrystal suspension (plot a) for each gram of  $\text{Fe}^{3+}$ -CSs; secondary growth of the ZSM-5 shell in a nutrient sol (Si/Al = 50) at 95  $^\circ\text{C}$  for 1 day.

**Note:** The actual Si/Al ratio in the prepared  $\text{Fe}_2\text{O}_3@\text{ZSM-5}$  DSHSs was determined to be 57 by the X-ray fluorescence analysis. We note that  $\text{MO}@\text{ZSM-5}$  DSHSs with a Si/Al ratio of around 25 or lower were not attainable at present, due to the failure in the synthesis of the corresponding zeolite nanocrystals by the present method.

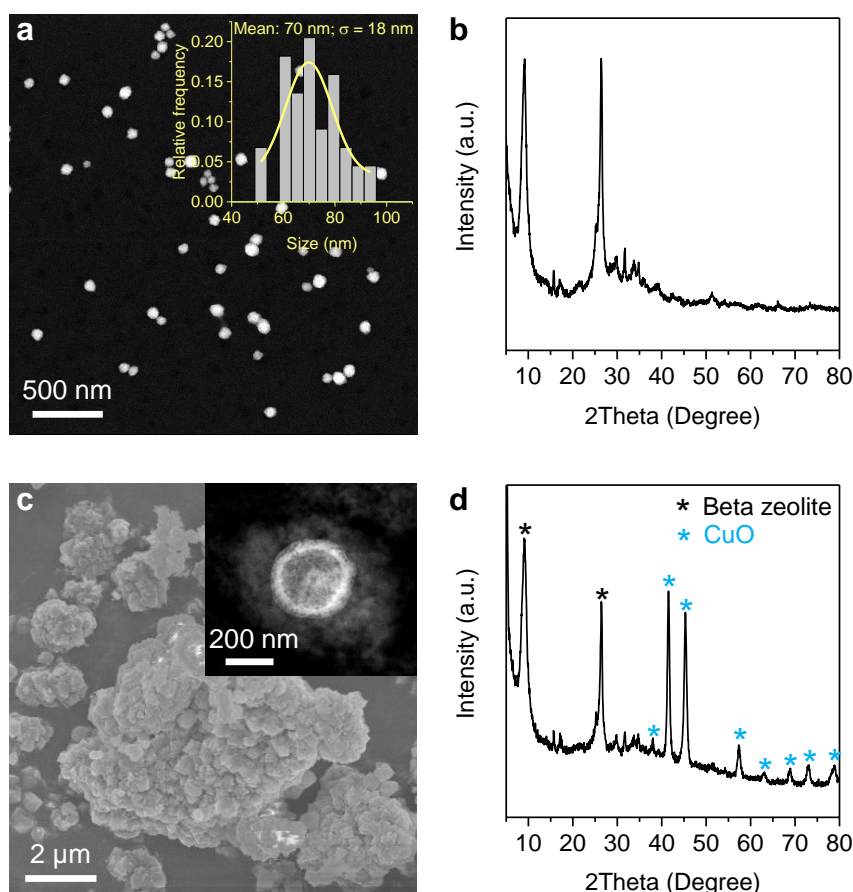

**Supplementary Fig. 26: Characterization of the synthesized Si-Beta zeolite nanocrystals and CuO@Beta DSHSs.** (a) STEM-HAADF image, size distribution and XRD patterns of the Si-Beta zeolite nanocrystals. (c) SEM and STEM-HAADF image, and (d) XRD patterns of CuO@Si-Beta zeolite DSHSs. Synthetic conditions for CuO@Si-Beta zeolite DSHSs: 2.0 M  $\text{Cu}(\text{NO}_3)_2$  for treating 1.2  $\mu\text{m}$  CSs at room temperature; 15 mL Si-Beta zeolite nanocrystal (panel a and b) suspension (1 wt% in distilled water) for each gram of  $\text{Cu}^{2+}$ -CSs; secondary growth of the Si-Beta zeolitic shell at 170 °C for 15 h in a rotating Teflon lined stainless steel autoclave.



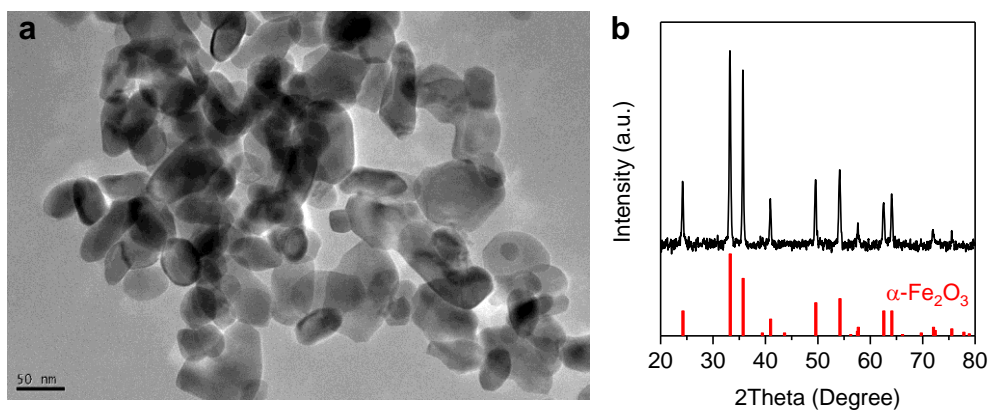

**Supplementary Fig. 27: Characterization of bulk  $\text{Fe}_2\text{O}_3$ .** (a) TEM image and (b) XRD patterns of bulk  $\text{Fe}_2\text{O}_3$ . All peaks of the XRD patterns are matched with the phase of  $\alpha\text{-Fe}_2\text{O}_3$  (JCPDS No. 33-0664). Note that the XRD patterns of bulk  $\text{Fe}_2\text{O}_3$  were acquired with a Cu K $\alpha$  radiation source ( $\lambda = 1.54056\text{\AA}$ ), while the XRD patterns of most other samples were acquired with a Co K $\alpha$  irradiation source ( $\lambda = 1.789\text{\AA}$ ).

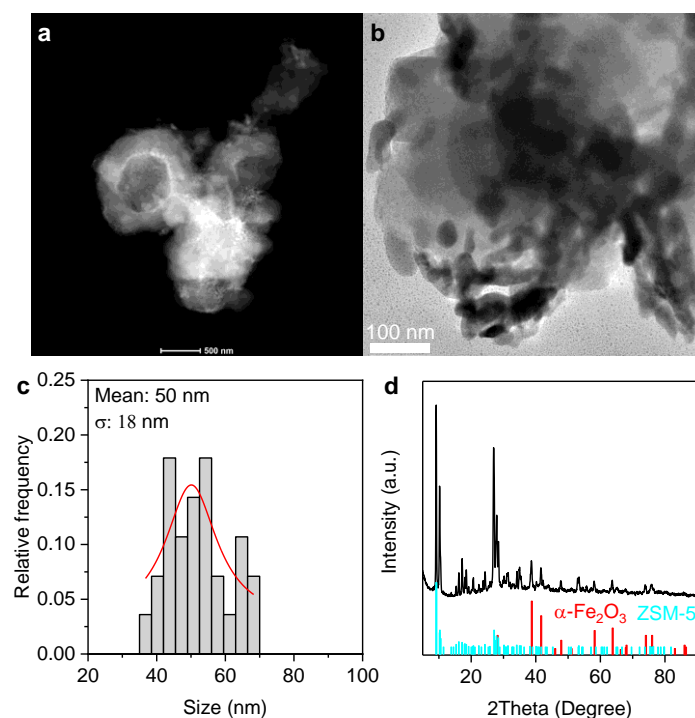

**Supplementary Fig. 28: Characterization of Fe<sub>2</sub>O<sub>3</sub>/ZSM-5 prepared by a typical impregnation method.** (a) STEM-HAADF image and (b) TEM image of Fe<sub>2</sub>O<sub>3</sub>/ZSM-5. (c) Size distribution of Fe<sub>2</sub>O<sub>3</sub> in Fe<sub>2</sub>O<sub>3</sub>/ZSM-5. (d) XRD pattern of Fe<sub>2</sub>O<sub>3</sub>/ZSM-5.

**Note:** The mass fraction of Fe<sub>2</sub>O<sub>3</sub> to ZSM-5 in this material was determined to be 1:9 by the X-ray fluorescence analysis.

**Supplementary Table 2. Catalytic performances of iron catalysts and bifunctional catalysts in syngas conversion.**

| Catalyst                 | $X_{CO}$<br>(%) | $S_{CO_2}$<br>(%) | Hydrocarbon selectivity (%) |             |             |            |           | $C_{5-11}$ fraction (%) |             |           |
|--------------------------|-----------------|-------------------|-----------------------------|-------------|-------------|------------|-----------|-------------------------|-------------|-----------|
|                          |                 |                   | $CH_4$                      | $C_{2-4}^=$ | $C_{2-4}^0$ | $C_{5-11}$ | $C_{12+}$ | <i>aro.</i>             | <i>iso.</i> | <i>n.</i> |
| b- $Fe_2O_3$             | 8.0             | 16.0              | 20.0                        | 28.1        | 18.8        | 33.1       | 0.0       | 0                       | 12.1        | 87.9      |
| hs- $Fe_2O_3$            | 49.0            | 27.0              | 12.3                        | 28.8        | 19.5        | 38.4       | 1.0       | 0                       | 10.5        | 89.5      |
| $Fe_2O_3$ @S-1 DSHSs     | 62.3            | 24.3              | 16.8                        | 25.5        | 21.0        | 36.7       | 0.0       | 0                       | 16.3        | 81.7      |
| hs- $Fe_2O_3$ +H-ZSM-5   | 50.3            | 24.2              | 18.9                        | 12.8        | 24.0        | 44.2       | 0.0       | 42.1                    | 41.0        | 17.0      |
| $Fe_2O_3$ /H-ZSM-5       | 57.0            | 24.0              | 15.0                        | 16.0        | 14.0        | 55.0       | 0.0       | 23.5                    | 51.3        | 25.2      |
| $Fe_2O_3$ @H-ZSM-5 DSHSs | 79.0            | 25.6              | 5.7                         | 15.9        | 14.1        | 64.0       | 0.3       | 34.7                    | 51.3        | 14.0      |

Reaction conditions:  $W_{cat} = 0.03$  (for catalysts without acid sites) or 0.3 g (for bifunctional catalysts),  $H_2/CO = 2/1$ ,  $F_{syngas} = 30 \text{ mL min}^{-1}$ ,  $T = 300 \text{ }^\circ\text{C}$ ,  $P = 3 \text{ MPa}$ , Time on stream = 15 h.  $C_{2-4}^0$ ,  $C_{2-4}^=$ ,  $C_{5-11}$  and  $C_{12+}$  denote  $C_2$ - $C_4$  paraffins,  $C_2$ - $C_4$  olefins,  $C_5$ - $C_{11}$  hydrocarbons and products with carbon numbers greater than or equal to 12, respectively. *Aro.*, *iso.* and *n.* denote aromatics, *iso*-alkanes/*iso*-alkenes and *n*-alkanes/*n*-alkenes in  $C_{5-11}$  range hydrocarbons.

**Note:** It should be mentioned that the H-ZSM-5 component in hs- $Fe_2O_3$ +H-ZSM-5 and  $Fe_2O_3$ /H-ZSM-5 were made using CSs as the template and following the same synthetic procedures as for  $Fe_2O_3$ @H-ZSM-5 DSHSs (Supplementary Figs. 9c and d). This is to ensure the same properties of H-ZSM-5 ( $Si/Al = \text{ca. } 100$ ) in hs- $Fe_2O_3$ +H-ZSM-5,  $Fe_2O_3$ /H-ZSM-5 and  $Fe_2O_3$ @H-ZSM-5 DSHSs, allowing for a fair comparison between them. Also, the  $Fe_2O_3$ /H-ZSM-5 mass proportion of hs- $Fe_2O_3$ +H-ZSM-5 and  $Fe_2O_3$ /H-ZSM-5 was tailored to be the same as that of  $Fe_2O_3$ @H-ZSM-5 DSHSs (1:9), according to the X-ray fluorescence analysis.

**Supplementary Table 3.  $S_{\text{BET}}$  values of the catalysts.**

| Sample                                 | $S_{\text{BET}}$ ( $\text{m}^2/\text{g}$ ) |
|----------------------------------------|--------------------------------------------|
| b- $\text{Fe}_2\text{O}_3$             | 18.1                                       |
| hs- $\text{Fe}_2\text{O}_3$            | 61.2                                       |
| $\text{Fe}_2\text{O}_3$ @S-1 DSHSs     | 342.9                                      |
| hs- $\text{Fe}_2\text{O}_3$ +H-ZSM-5   | 300.2                                      |
| $\text{Fe}_2\text{O}_3$ /H-ZSM-5       | 278.8                                      |
| $\text{Fe}_2\text{O}_3$ @H-ZSM-5 DSHSs | 311.5                                      |

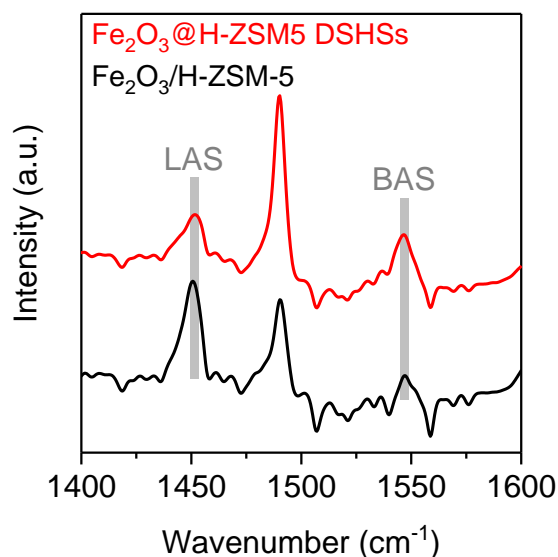

**Supplementary Fig. 29: Comparison of the acid properties between  $\text{Fe}_2\text{O}_3@H\text{-ZSM-5 DSHSs}$  and  $\text{Fe}_2\text{O}_3/H\text{-ZSM-5}$ .** Pyridine adsorbed IR spectra of  $\text{Fe}_2\text{O}_3@H\text{-ZSM-5 DSHSs}$  and  $\text{Fe}_2\text{O}_3/H\text{-ZSM-5}$ . The characteristic peaks of adsorbed pyridine on Brønsted acid sites (BAS) and Lewis acid sites (LAS) appear at 1545 cm<sup>-1</sup> and 1450 cm<sup>-1</sup>, respectively.

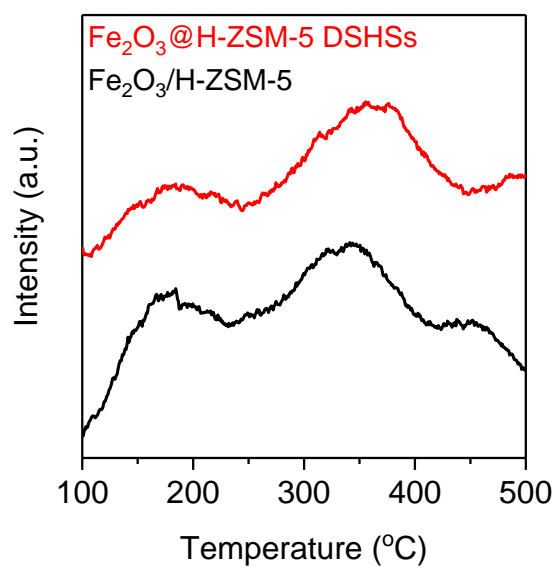

**Supplementary Fig. 30: NH<sub>3</sub>-TPD profiles of Fe<sub>2</sub>O<sub>3</sub>@H-ZSM-5 DSHSs and Fe<sub>2</sub>O<sub>3</sub>/H-ZSM-5.**

**Supplementary Table 4. Effect of the H-ZSM-5 shell thickness on the catalytic performance of Fe<sub>2</sub>O<sub>3</sub>@H-ZSM-5 DSHs in syngas conversion.**

| H-ZSM-5 thickness                                   | $m_{\text{Fe}_2\text{O}_3}/m_{\text{H-ZSM-5}}^{\text{a}}$ | $X_{\text{CO}}$<br>(%) | $S_{\text{CO}_2}$<br>(%) | Hydrocarbon selectivity (%) |                               |                               |                   |                  |
|-----------------------------------------------------|-----------------------------------------------------------|------------------------|--------------------------|-----------------------------|-------------------------------|-------------------------------|-------------------|------------------|
|                                                     |                                                           |                        |                          | CH <sub>4</sub>             | C <sub>2-4</sub> <sup>=</sup> | C <sub>2-4</sub> <sup>0</sup> | C <sub>5-11</sub> | C <sub>12+</sub> |
| ca.100 nm<br>(Supplementary Fig. 31a) <sup>b</sup>  | 1:3                                                       | 74.1                   | 29.9                     | 13.0                        | 35.6                          | 13.0                          | 38.4              | 0                |
| ca. 290 nm<br>(Supplementary Fig. 31b) <sup>b</sup> | 1:9                                                       | 79.0                   | 25.6                     | 5.7                         | 15.9                          | 14.1                          | 64.0              | 0.3              |
| ca.480 nm<br>(Supplementary Fig. 31c) <sup>b</sup>  | 1:20                                                      | 65.6                   | 28.4                     | 22.9                        | 12.3                          | 29.4                          | 35.4              | 0                |

<sup>a</sup>Determined by the X-ray fluorescence analysis.

<sup>b</sup>The Fe<sub>2</sub>O<sub>3</sub> shell thickness was fixed at ca. 50 nm.

Reaction conditions:  $W_{\text{cat}} = 0.3$  g,  $\text{H}_2/\text{CO} = 2/1$ ,  $F_{\text{syngas}} = 30$  mL min<sup>-1</sup>,  $T = 300$  °C,  $P = 3$  MPa, Time on stream = 15 h. C<sub>2-4</sub><sup>0</sup>, C<sub>2-4</sub><sup>=</sup>, C<sub>5-11</sub> and C<sub>12+</sub> denote C<sub>2</sub>–C<sub>4</sub> paraffins, C<sub>2</sub>–C<sub>4</sub> olefins, C<sub>5</sub>–C<sub>11</sub> hydrocarbons and products with carbon numbers greater than or equal to 12, respectively.

**Note:** The Fe<sub>2</sub>O<sub>3</sub>/H-ZSM-5 proportion in Fe<sub>2</sub>O<sub>3</sub>@H-ZSM-5 DSHs is controllable by tuning the thickness of one layer (e.g., HZSM-5) while fixing the thickness of the other layer (e.g., Fe<sub>2</sub>O<sub>3</sub>). Upon a constant Fe<sub>2</sub>O<sub>3</sub> layer thickness of approximately 50 nm, adjustment of the quantity ratio of H-ZSM-5 nanocrystal to Fe<sup>3+</sup>-CSs during the synthesis increased the H-ZSM-5 shell thickness from approximately 100 to 290 and to 480 nm (Supplementary Fig. 31), resulting in the decrease of the mass ratio of Fe<sub>2</sub>O<sub>3</sub> to H-ZSM-5 from 1:3 to 1:9 and to 1:20 (Supplementary Table 4). The proportion of Fe<sub>2</sub>O<sub>3</sub> to H-ZSM-5 significantly impacted the performance of Fe<sub>2</sub>O<sub>3</sub>@H-ZSM-5 DSHs (Supplementary Table 4 and Fig. 32). All the three catalysts exhibited high CO conversions (> 65%). Fe<sub>2</sub>O<sub>3</sub>@H-ZSM-5 DSHs with a  $m_{\text{Fe}_2\text{O}_3}/m_{\text{H-ZSM-5}}$  ratio of 1:9 exhibited the optimal performance in gasoline production. When the H-ZSM-5 shell thickness decreased to ca. 100 nm, the C<sub>2</sub>–C<sub>4</sub> olefins selectivity increased notably, as a result of insufficient acid sites to catalyze the oligomerization reaction. Too thick a H-ZSM-5 shell (ca. 480 nm) was found to result in high selectivities of methane and C<sub>2</sub>–C<sub>4</sub> alkanes, which is most likely due to the mass transfer limitation. The optimal Fe<sub>2</sub>O<sub>3</sub>/H-ZSM-5 mass ratio (1:9) was close to other reported results<sup>6,7</sup>.

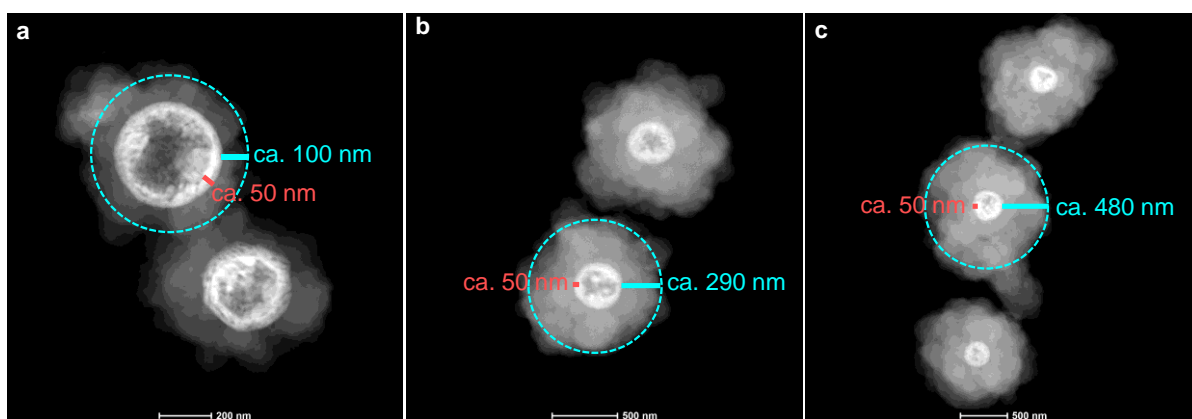

**Supplementary Fig. 31. Control of the  $\text{Fe}_2\text{O}_3/\text{H-ZSM-5}$  proportion in  $\text{Fe}_2\text{O}_3@\text{H-ZSM-5}$  DSHSs by tuning the HZSM-5 shell thickness while fixing the thickness of the  $\text{Fe}_2\text{O}_3$  layer.** STEM images of the prepared  $\text{Fe}_2\text{O}_3@\text{H-ZSM-5}$  DSHSs with a ca. 50-nm thick  $\text{Fe}_2\text{O}_3$  layer and an approximately (a) 100, (b) 290 and (c) 480 nm thick H-ZSM-5 shell. The concentration of the  $\text{Fe}(\text{NO}_3)_3$  doping solution was fixed at 1.5 M, while 2.5 mL, 15 mL and 30 mL H-ZSM-5 nanocrystal suspension (1 wt% in distilled water) were used in a, b and c, respectively, for each gram of  $\text{Fe}^{3+}$ -CSs.



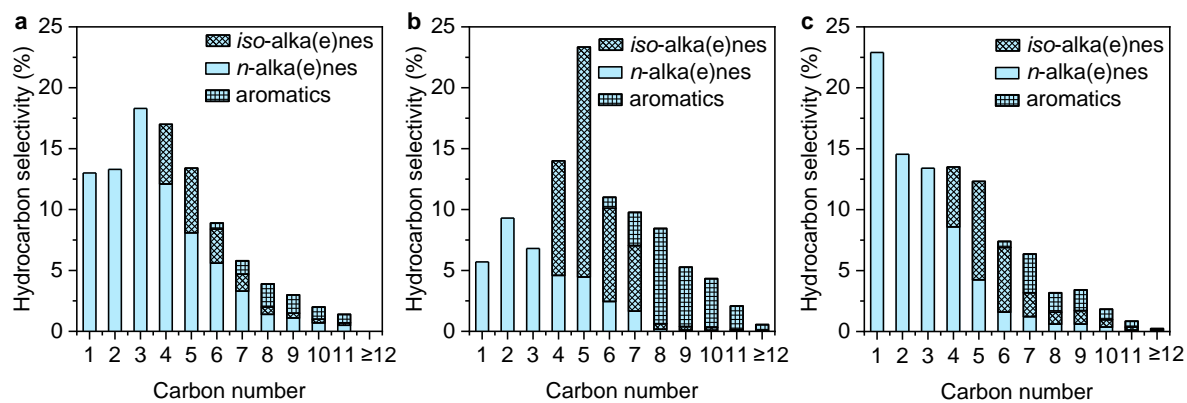

**Supplementary Fig. 32. Distribution of the hydrocarbon products over Fe<sub>2</sub>O<sub>3</sub>@H-ZSM-5 DSHs with different H-ZSM-5 shell thicknesses.** (a) ca. 100 nm (Supplementary Fig. 31a); (b) ca. 290 nm (Supplementary Fig. 31b); and (c) ca. 480 nm (Supplementary Fig. 31c).

**Supplementary Table 5. Comparison between the performances of the state-of-the-art Fe-zeolite-based bifunctional catalysts in gasoline production via FTS.**

| Catalyst                                                     | T<br>(°C) | X <sub>CO</sub><br>(%) | S <sub>CO2</sub><br>(%) | Hydrocarbon selectivity (%) |                  |                   |      | Ref.      |
|--------------------------------------------------------------|-----------|------------------------|-------------------------|-----------------------------|------------------|-------------------|------|-----------|
|                                                              |           |                        |                         | CH <sub>4</sub>             | C <sub>2-4</sub> | C <sub>5-11</sub> | aro. |           |
| Fe-Pd/H-ZSM-5                                                | 310       | 75.7                   | 21.4                    | 22.1                        | 28.4             | 49.5              | 15.8 | 6         |
| FeMn@H-ZSM-5                                                 | 320       | 51.9                   | 36.6                    | 15.0                        | 22.9             | 62.1              | 47.1 | 8         |
| FeZnNa/H-ZSM-5                                               | 340       | 88.8                   | 27.5                    | 9.6                         | 26.6             | 63.8              | 50.6 | 9         |
| Fe <sub>3</sub> O <sub>4</sub> @MnO <sub>2</sub> +HOL-HZSM-5 | 320       | 90.3                   | 45.0                    | 5.0                         | 25.0             | 70.0              | 56.6 | 10        |
| Fe <sub>3</sub> O <sub>4</sub> @MnO <sub>2</sub> +HOL-HZSM-5 | 320       | 69.3                   | 47.6                    | 4.0                         | 15.6             | 80.4              | 55.2 | 11        |
| Fe <sub>2</sub> O <sub>3</sub> @H-ZSM-5 DSHSs                | 300       | 79.0                   | 25.6                    | 5.7                         | 30.0             | 64.0              | 22.2 | This work |

**Note:** For the C<sub>5</sub>–C<sub>11</sub> range hydrocarbons, the best bifunctional iron-zeolite catalysts (Fe<sub>3</sub>O<sub>4</sub>@MnO<sub>2</sub>+hollow HZSM-5) could offer a high selectivity of around 70–80%<sup>10,11</sup>. However, around 69–81% of the C<sub>5</sub>–C<sub>11</sub> products were mixed aromatics. This does not meet the environmental requirement for high-quality gasoline that the aromatics content should be restricted to lower than 35%<sup>12,13</sup>. The formation of aromatics is thermodynamically favorable under harsh reaction conditions, which is one major reason that most bifunctional catalysts with high selectivity of C<sub>5</sub>–C<sub>11</sub> hydrocarbons often produce aromatics rather than *iso*-alkanes. The aromatics fraction in C<sub>5</sub>–C<sub>11</sub> hydrocarbons produced by our Fe<sub>2</sub>O<sub>3</sub>@H-ZSM-5 DSHSs catalyst was 34.7%, and the fraction of *iso*-alkanes and *iso*-alkenes was as high as 51.3% (Supplementary Table 2). Although the C<sub>5</sub>–C<sub>11</sub> selectivity of Fe<sub>2</sub>O<sub>3</sub>@H-ZSM-5 DSHSs is slightly lower than that of the best bifunctional catalysts reported in the literature, the composition of liquid hydrocarbons was much closer to the requirement of practical gasoline. This is the ascendancy of our catalyst over the state-of-the-art Fe-zeolite-based bifunctional catalysts in the aspect of gasoline production performance via FTS. Note that the performance of Fe<sub>2</sub>O<sub>3</sub>@H-ZSM-5 DSHSs is expected to be further enhanced by the diameter refinement and/or proper doping of promoters (e.g., Mn, Na or K) into the Fe<sub>2</sub>O<sub>3</sub> layer in the future.

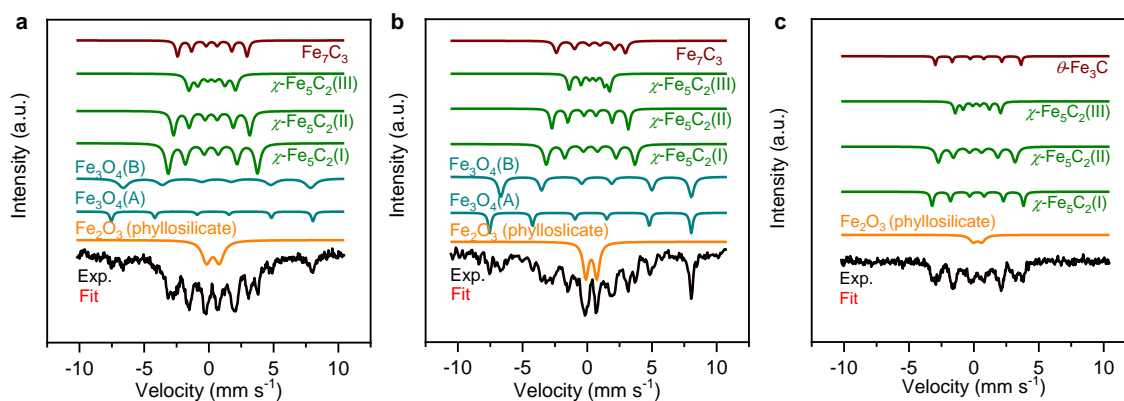

**Supplementary Fig. 33. Detection of the formed iron carbides (FeC<sub>x</sub>) in the bifunctional catalysts.** Mössbauer spectra of (a) Fe<sub>2</sub>O<sub>3</sub>@H-ZSM-5 DSHSs, (b) Fe<sub>2</sub>O<sub>3</sub>/H-ZSM-5 and (c) hs-Fe<sub>2</sub>O<sub>3</sub>+H-ZSM-5 following FTS for 45 h.

**Supplementary Table 6. Phase quantification of iron species in reacted Fe<sub>2</sub>O<sub>3</sub>@H-ZSM-5 DSHSs, Fe<sub>2</sub>O<sub>3</sub>/H-ZSM-5 and hs-Fe<sub>2</sub>O<sub>3</sub>+H-ZSM-5 for 45 h on stream.**

| Reacted catalysts                                | Iron species                           | Ratio (%) | Ratio (%)                      |
|--------------------------------------------------|----------------------------------------|-----------|--------------------------------|
| Fe <sub>2</sub> O <sub>3</sub> @H-ZSM-5<br>DSHSs | Fe <sub>2</sub> O <sub>3</sub>         | 14.8±2.6  | Carbides: 65.9<br>Oxides: 34.1 |
|                                                  | Fe <sub>3</sub> O <sub>4</sub> (I)     | 5.0±1.8   |                                |
|                                                  | Fe <sub>3</sub> O <sub>4</sub> (II)    | 14.3±4.2  |                                |
|                                                  | χ-Fe <sub>5</sub> C <sub>2</sub> (I)   | 25.7±4.0  |                                |
|                                                  | χ-Fe <sub>5</sub> C <sub>2</sub> (II)  | 12.9±2.7  |                                |
|                                                  | χ-Fe <sub>5</sub> C <sub>2</sub> (III) | 18.0±8.6  |                                |
|                                                  | Fe <sub>7</sub> C <sub>3</sub>         | 9.2±6.4   |                                |
| Fe <sub>2</sub> O <sub>3</sub> /H-ZSM-5          | Fe <sub>2</sub> O <sub>3</sub>         | 17.4±2.5  | Carbides: 52.4<br>Oxides: 47.6 |
|                                                  | Fe <sub>3</sub> O <sub>4</sub> (I)     | 11.0±3.2  |                                |
|                                                  | Fe <sub>3</sub> O <sub>4</sub> (II)    | 19.2±4.7  |                                |
|                                                  | χ-Fe <sub>5</sub> C <sub>2</sub> (I)   | 19.0±6.7  |                                |
|                                                  | χ-Fe <sub>5</sub> C <sub>2</sub> (II)  | 13.0±8.7  |                                |
|                                                  | χ-Fe <sub>5</sub> C <sub>2</sub> (III) | 10.6±3.4  |                                |
|                                                  | Fe <sub>7</sub> C <sub>3</sub>         | 9.8±7.5   |                                |
| hs-Fe <sub>2</sub> O <sub>3</sub> +H-ZSM-5       | Fe <sub>2</sub> O <sub>3</sub>         | 11.5±3.8  | Carbides: 88.5<br>Oxides: 11.5 |
|                                                  | χ-Fe <sub>5</sub> C <sub>2</sub> (I)   | 21.3±8.9  |                                |
|                                                  | χ-Fe <sub>5</sub> C <sub>2</sub> (II)  | 38.8±8.1  |                                |
|                                                  | χ-Fe <sub>5</sub> C <sub>2</sub> (III) | 19.1±4.5  |                                |
|                                                  | Θ-Fe <sub>3</sub> C                    | 9.3±9.1   |                                |

**Note:** hs-Fe<sub>2</sub>O<sub>3</sub>+H-ZSM-5 was ahead of others in terms of the FeC<sub>x</sub> content because of an excellent iron dispersion and segregation of iron and H-ZSM-5. Fe<sub>2</sub>O<sub>3</sub>@H-ZSM-5 DSHSs exhibited a lower FeC<sub>x</sub> content than hs-Fe<sub>2</sub>O<sub>3</sub>+H-ZSM-5 due likely to the Fe<sub>2</sub>O<sub>3</sub>@H-ZSM-5 core-shell structure. The formation of FeC<sub>x</sub> were the least in the case of Fe<sub>2</sub>O<sub>3</sub>/H-ZSM-5 likely due to the strong Fe-HZSM-5 chemical interactions that may cause the formation of iron silicates or aluminates at high temperatures that are hard to be reduced or carbonized<sup>14,15</sup>.

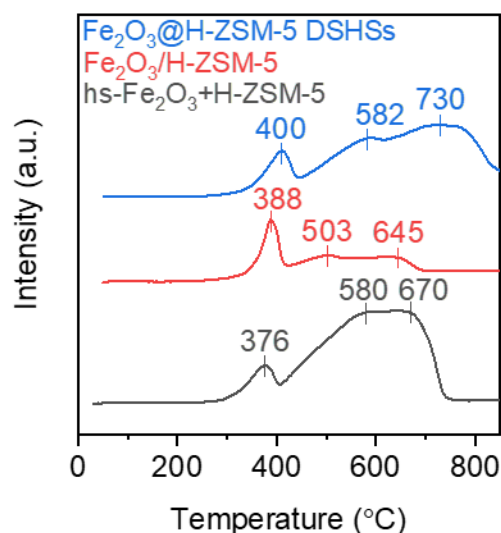

**Supplementary Fig. 34. H<sub>2</sub> temperature-programmed reduction (H<sub>2</sub>-TPR) profiles of the prepared bifunctional catalysts.**

**Note:** The H<sub>2</sub>-TPR profiles exhibit several hydrogen consumption peaks, attributing to the reduction of different iron species. The low-temperature peaks at 380–400 °C were attributed to the reduction of hematite (Fe<sub>2</sub>O<sub>3</sub>) to magnetite (Fe<sub>3</sub>O<sub>4</sub>), while the high-temperature peaks corresponded to the transformation process of Fe<sub>3</sub>O<sub>4</sub> → FeO → Fe. The reducibility of iron species in the bifunctional catalysts followed the order of hs-Fe<sub>2</sub>O<sub>3</sub>+H-ZSM-5 > Fe<sub>2</sub>O<sub>3</sub>@H-ZSM-5 DSHSs > Fe<sub>2</sub>O<sub>3</sub>/H-ZSM-5, in line with the carbonization result (Supplementary Table 6).

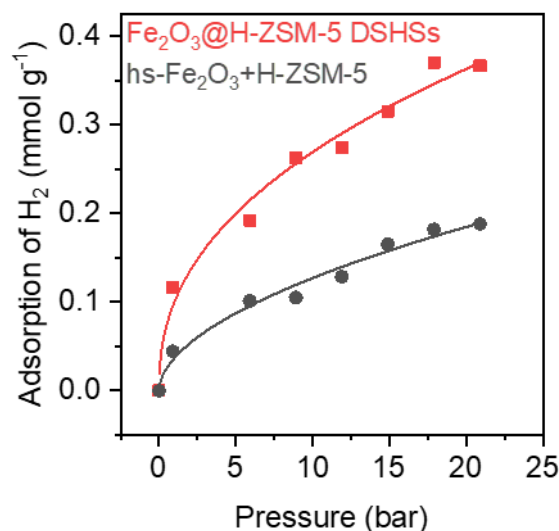

**Supplementary Fig. 35. H<sub>2</sub> adsorption isotherm of Fe<sub>2</sub>O<sub>3</sub>@H-ZSM-5 DSHSs and hs-Fe<sub>2</sub>O<sub>3</sub>+H-ZSM-5.**

**Note:** The surface areas of Fe<sub>2</sub>O<sub>3</sub>@H-ZSM-5 DSHSs and hs-Fe<sub>2</sub>O<sub>3</sub>+H-ZSM-5 were almost the same (Supplementary Table 2), and these two materials included the same hollow-sphere Fe<sub>2</sub>O<sub>3</sub>. The only difference lay in that the H-ZSM-5 in Fe<sub>2</sub>O<sub>3</sub>@H-ZSM-5 DSHSs and hs-Fe<sub>2</sub>O<sub>3</sub>+H-ZSM-5 were hollow-sphere and solid-sphere, respectively. Thus, the significantly higher H<sub>2</sub> adsorption capacity in the case of Fe<sub>2</sub>O<sub>3</sub>@H-ZSM-5 DSHSs was most likely due to the “cage” effect of the hollow H-ZSM-5 sphere. The enrichment effect of a hollow chamber was also reported by Ma *et al.*<sup>16</sup>, which increased the local concentration of H<sub>2</sub> around the active sites, resulting in an accelerated reaction rate and an improved catalytic performance.

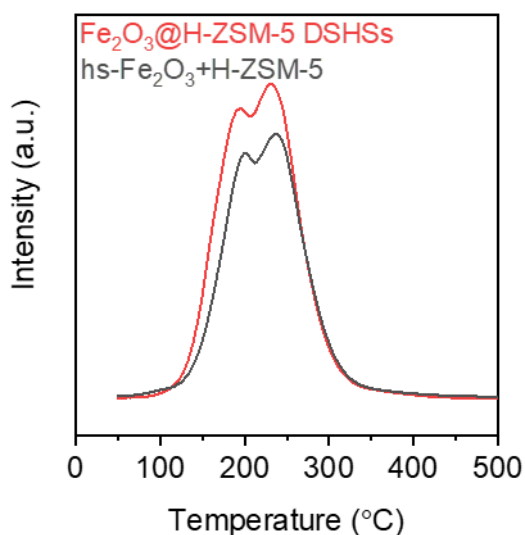

**Supplementary Fig. 36.  $C_3H_6$ -TPD profiles of  $Fe_2O_3@H-ZSM-5$  DSHSs and  $hs-Fe_2O_3+H-ZSM-5$ .** The  $C_3H_6$ -TPD intensity was normalized to the same acid density (obtained from  $NH_3$ -TPD).

**Note:**  $Fe_2O_3@H-ZSM-5$  DSHSs exhibited a larger uptake of  $C_3H_6$  (a possible reaction intermediate in gasoline production via FTS) than  $hs-Fe_2O_3+H-ZSM-5$ , in keeping with the  $H_2$  adsorption isotherms (Supplementary Fig. 34). This indicates again that the hollow-sphere H-ZSM-5 as the outer shell in  $Fe_2O_3@H-ZSM-5$  DSHSs could enrich the reactants and reaction intermediates.

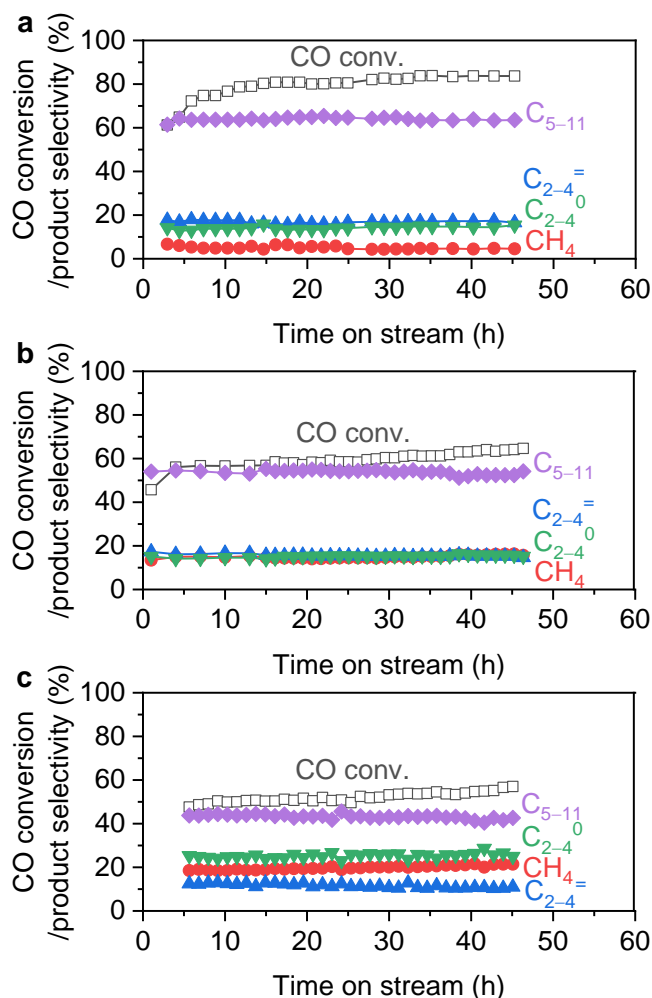

**Supplementary Fig. 37. Catalytic stabilities of (a) Fe<sub>2</sub>O<sub>3</sub>@H-ZSM-5 DSHSs, (b) Fe<sub>2</sub>O<sub>3</sub>/H-ZSM-5 and (c) hs-Fe<sub>2</sub>O<sub>3</sub>+H-ZSM-5.**

**Note:** It was found that after a short induction time of 10 h, the performance of Fe<sub>2</sub>O<sub>3</sub>@H-ZSM-5 DSHSs became stable and no catalyst deactivation was observed during 45 h on steam (plot a). An induction period was required possibly because of the core-shell architecture that slightly decelerated the carburization of the inner Fe<sub>2</sub>O<sub>3</sub> layer into active carbide phases. The CO conversion and C<sub>5</sub>–C<sub>11</sub> selectivity maintained at about 80% and 64%, respectively. The hs-Fe<sub>2</sub>O<sub>3</sub>+H-ZSM-5 and Fe<sub>2</sub>O<sub>3</sub>/H-ZSM-5 catalysts also exhibited stable performances in syngas conversion (plot c; Supplementary Table 7).



**Supplementary Table 7. Catalytic performance over the bifunctional catalysts of different times on stream.**

| Catalyst                 | Time on stream (h) | $X_{CO}$ (%) | $S_{CO_2}$ (%) | Hydrocarbon selectivity (%) |             |             |            |           | $C_{5-11}$ fraction (%) |             |           |
|--------------------------|--------------------|--------------|----------------|-----------------------------|-------------|-------------|------------|-----------|-------------------------|-------------|-----------|
|                          |                    |              |                | $CH_4$                      | $C_{2-4}^=$ | $C_{2-4}^0$ | $C_{5-11}$ | $C_{12+}$ | <i>aro.</i>             | <i>iso.</i> | <i>n.</i> |
| hs- $Fe_2O_3$ +H-ZSM-5   | 15                 | 50.3         | 24.2           | 18.9                        | 12.8        | 24.0        | 44.2       | 0.0       | 42.1                    | 41.0        | 17.0      |
| hs- $Fe_2O_3$ +H-ZSM-5   | 45                 | 57.1         | 26.0           | 21.4                        | 11.0        | 25.0        | 42.6       | 0.0       | 40.0                    | 42.0        | 18.0      |
| $Fe_2O_3$ /H-ZSM-5       | 15                 | 57.0         | 24.0           | 15.0                        | 16.0        | 14.0        | 55.0       | 0.0       | 23.5                    | 51.2        | 25.3      |
| $Fe_2O_3$ /H-ZSM-5       | 45                 | 64.1         | 26.1           | 16.3                        | 15.3        | 15.7        | 52.4       | 0.4       | 23.0                    | 51.6        | 25.4      |
| $Fe_2O_3$ @H-ZSM-5 DSHSs | 15                 | 79.0         | 25.6           | 5.7                         | 15.9        | 14.1        | 64.0       | 0.3       | 34.7                    | 51.3        | 14.0      |
| $Fe_2O_3$ @H-ZSM-5 DSHSs | 45                 | 83.6         | 26.0           | 5.0                         | 16.0        | 15.4        | 63.5       | 0.2       | 34.0                    | 51.0        | 14.9      |

Reaction conditions:  $W_{cat} = 0.3$  g,  $H_2/CO = 2/1$ ,  $F_{syngas} = 30$  mL min<sup>-1</sup>, T = 300 °C, P = 3 MPa.  $C_{2-4}^0$ ,  $C_{2-4}^=$ ,  $C_{5-11}$  and  $C_{12+}$  denote  $C_2$ – $C_4$  paraffins,  $C_2$ – $C_4$  olefins,  $C_5$ – $C_{11}$  hydrocarbons and products with carbon numbers greater than or equal to 12, respectively. *Aro.*, *iso.* and *n.* denote aromatics, *iso*-hydrocarbons and *n*-hydrocarbons in  $C_{5-11}$  range hydrocarbons.

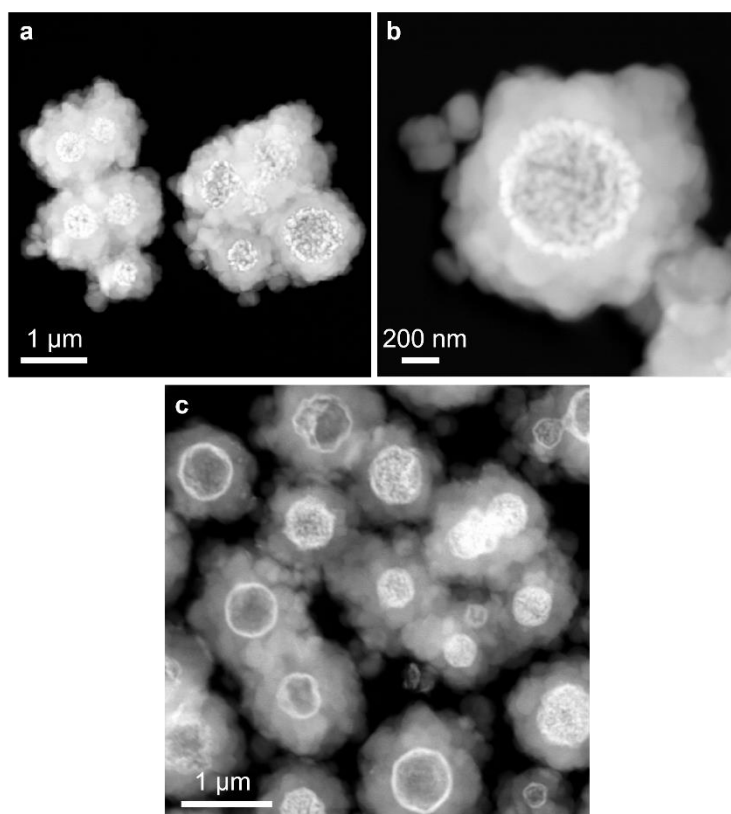

**Supplementary Fig. 38. Structural stability of  $\text{Fe}_2\text{O}_3@\text{H-ZSM-5}$  DSHSs after FTS reaction and regeneration.** STEM images of  $\text{Fe}_2\text{O}_3@\text{H-ZSM-5}$  DSHSs (a and b) after FTS for 45 h and (c) further regeneration by annealing at 500 °C in air for 2 h.

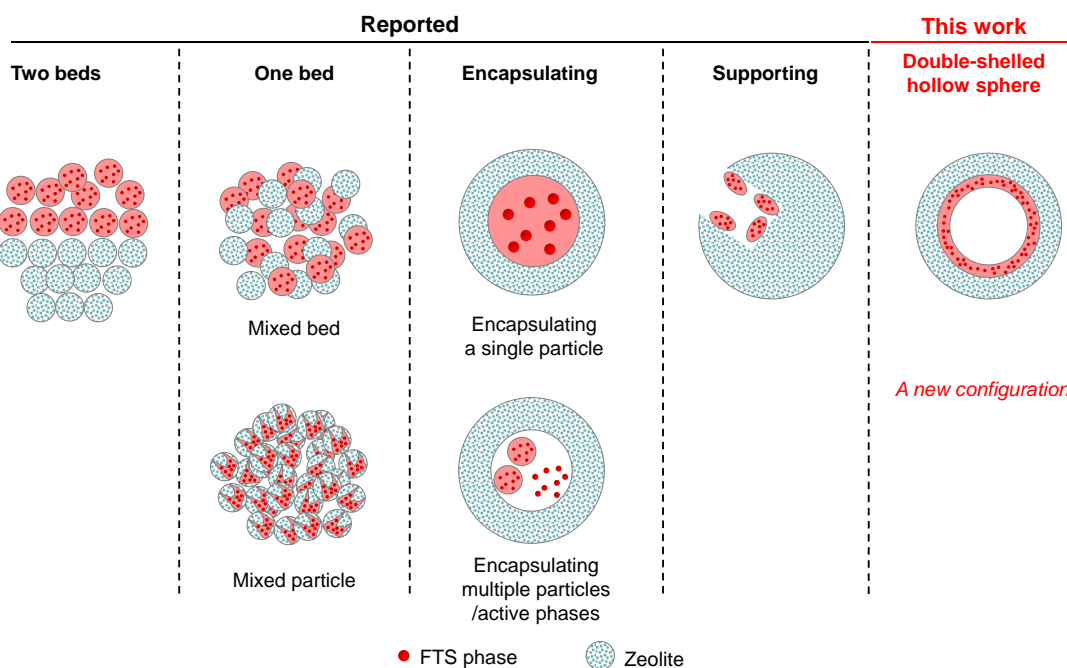

**Supplementary Fig. 39. Schematic representation of different configurations that FTS phases and the zeolite may have with respect to on another in bifunctional systems.**

**Note:** Our work provides a brand-new configuration between FTS phases and the zeolite compared with the existing ones<sup>17</sup>, in bifunctional systems.

## Supplementary references

1. Wang, J. Y. *et al.* Multi-shelled metal oxides prepared via an anion-adsorption mechanism for lithium-ion batteries. *Nat. Energy* **1**, 16050 (2016).
2. Wang, Q., Li, H., Chen, L. & Huang, X. Monodispersed hard carbon spherules with uniform nanopores. *Carbon* **39**, 2211–2214 (2001).
3. Góra-Marek, K., Derewiński, M., Sarv, P. & Datka, J. IR and NMR studies of mesoporous alumina and related aluminosilicates. *Catal. Today* **101**, 131–138 (2005).
4. Auer, B., Kumar, R., Schmidt, J. & Skinner, J. Hydrogen bonding and Raman, IR, and 2D-IR spectroscopy of dilute HOD in liquid D<sub>2</sub>O. *P. Natl. Acad. Sci.* **104**, 14215–14220 (2007).
5. Laidler, K. J. The development of the Arrhenius equation. *J. Chem. Ed.* **61**, 494 (1984).
6. Yan, Q. *et al.* Synthesis of Aromatic-Rich Gasoline-Range Hydrocarbons from Biomass-Derived Syngas over a Pd-Promoted Fe/HZSM-5 Catalyst. *Energy Fuels* **28**, 2027–2034 (2014).
7. Weber, J. L., Dugulan, I., de Jongh, P. E. & de Jong, K. P. Bifunctional Catalysis for the Conversion of Synthesis Gas to Olefins and Aromatics. *ChemCatChem* **10**, 1107–1112 (2018).
8. Xu, Y. *et al.* Yolk@Shell FeMn@Hollow HZSM-5 Nanoreactor for Directly Converting Syngas to Aromatics. *ACS Catal.* **11**, 4476–4485 (2021).
9. Zhao, B. *et al.* Direct Transformation of Syngas to Aromatics over Na-Zn-Fe<sub>5</sub>C<sub>2</sub> and Hierarchical HZSM-5 Tandem Catalysts. *Chem* **3**, 323–333 (2017).
10. Xu, Y. *et al.* Selective Conversion of Syngas to Aromatics over Fe<sub>3</sub>O<sub>4</sub>@MnO<sub>2</sub> and Hollow HZSM-5 Bifunctional Catalysts. *ACS Catal.* **9**, 5147–5156 (2019).
11. Xu, Y., Wang, J., Ma, G., Lin, J. & Ding, M. Designing of Hollow ZSM-5 with Controlled Mesopore Sizes To Boost Gasoline Production from Syngas. *ACS Sustain. Chem. Eng.* **7**, 18125–18132 (2019).
12. Li, N. *et al.* High-Quality Gasoline Directly from Syngas by Dual Metal Oxide–Zeolite (OX-ZEO) Catalysis. *Angew. Chem. Int. Ed.* **58**, 7400–7404 (2019).
13. Ramirez, A., Sarathy, S. M. & Gascon, J. CO<sub>2</sub> Derived E-Fuels: Research Trends, Misconceptions, and Future Directions. *Trends Chem.* **2**, 785–795 (2020).

14. Latham, K., Round, C. I. & Williams, C. D. Synthesis, further characterisation and catalytic activity of iron-substituted zeolite LTL, prepared using tetrahedral oxo-anion species. *Microporous Mesoporous Mater* **38**, 333–344 (2000).
15. Torres Galvis, H. M. *et al.* Iron Particle Size Effects for Direct Production of Lower Olefins from Synthesis Gas. *J. Am. Chem. Soc.* **134**, 16207–16215 (2012).
16. Yao, D. *et al.* A high-performance nanoreactor for carbon-oxygen bond hydrogenation reactions achieved by the morphology of nanotube-assembled hollow spheres. *ACS Catal.* **8**, 1218–1226 (2018).
17. Sartipi, S., Makkee, M., Kapteijn, F. & Gascon, J. Catalysis engineering of bifunctional solids for the one-step synthesis of liquid fuels from syngas: a review. *Catal. Sci. Technol.* **4**, 893–907 (2014).
